# Supplementary material for: Daily hypoxia forecasting and uncertainty assessment via Bayesian mechanistic model for the Northern Gulf of Mexico
Source: Copernicus journal article supplement (doi:10.5194/hess-2021-207), 2021-04-29
Supplement: Supplementary file 1 [file hess-2021-207-supplement.pdf]

# **Daily hypoxia forecasting and uncertainty assessment via Bayesian mechanistic model for the Northern Gulf of Mexico**

Alexey Katin<sup>1</sup>, Dario Del Giudice<sup>1</sup>, Daniel R. Obenour<sup>1</sup>

<sup>1</sup>Department of Civil, Construction, & Environmental Engineering, North Carolina State University, Raleigh, 27606, USA

**Supporting information**

## S1 Study site

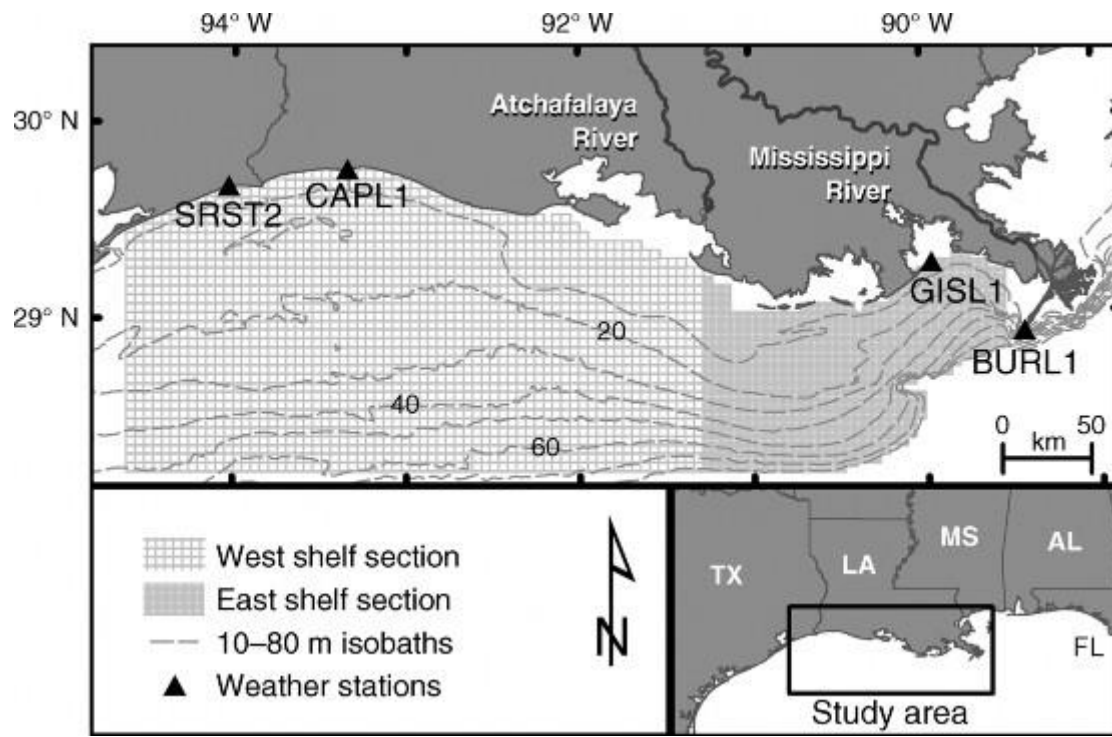

Figure S1: Map of the study area located in the Northern Gulf of Mexico (Obenour et al., 2015).

## S2 Bias adjustment for model predictions in June

Preliminary analysis indicated that hindcasted BWDO was somewhat lower than observations for the west section of the shelf in June. This bias remained after conversion of BWDO to HA. A linear regression with day number (June 1 – June 30) as the predictor was used to estimate a bias adjustment, defined as difference between average observed and hindcasted BWDO divided by hindcasted BWDO. The resulting regression indicates a gradual decline in bias from the beginning of June (+20%) to the end of June (+0%) (Fig. S2.1). The bias adjustment increases the  $R^2$  of relationship between observed and hindcasted BWDO from  $-0.16$  to  $0.36$  (Fig. S2.2), and between observed and hindcasted HA from  $-0.16$  to  $0.45$  (Fig. S2.3).

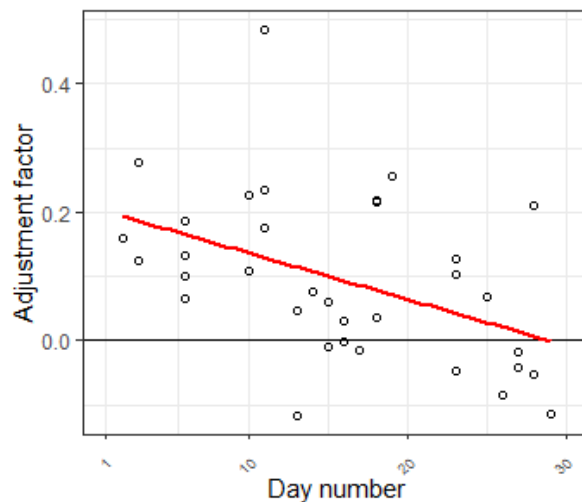

Figure S2.1: Bias adjustment factor vs day number for the west section in June with red line showing the regression fit with intercept term (0.208) and slope ( $-0.007$ ). The adjusted  $R^2$  of this regression is 0.18.

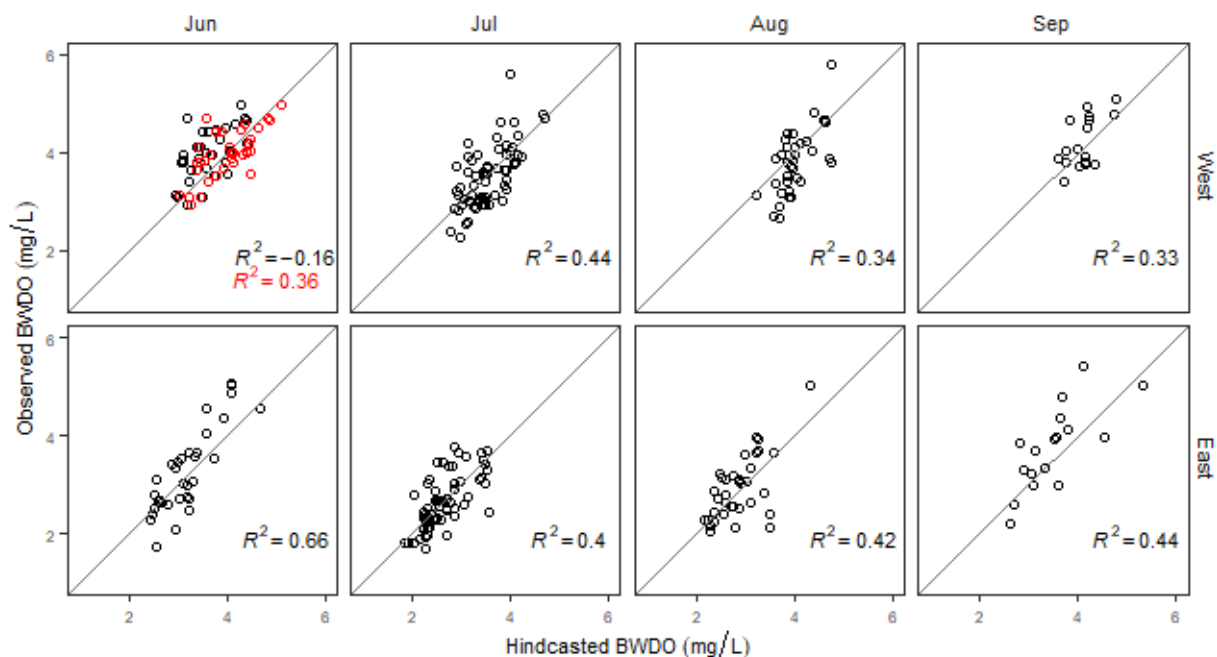

Figure S2.2: Month by month comparison of observed with hindcasted (black) and bias-adjusted hindcasted (red) averaged BWDO in the west and east sections. Diagonal lines represent perfect prediction.

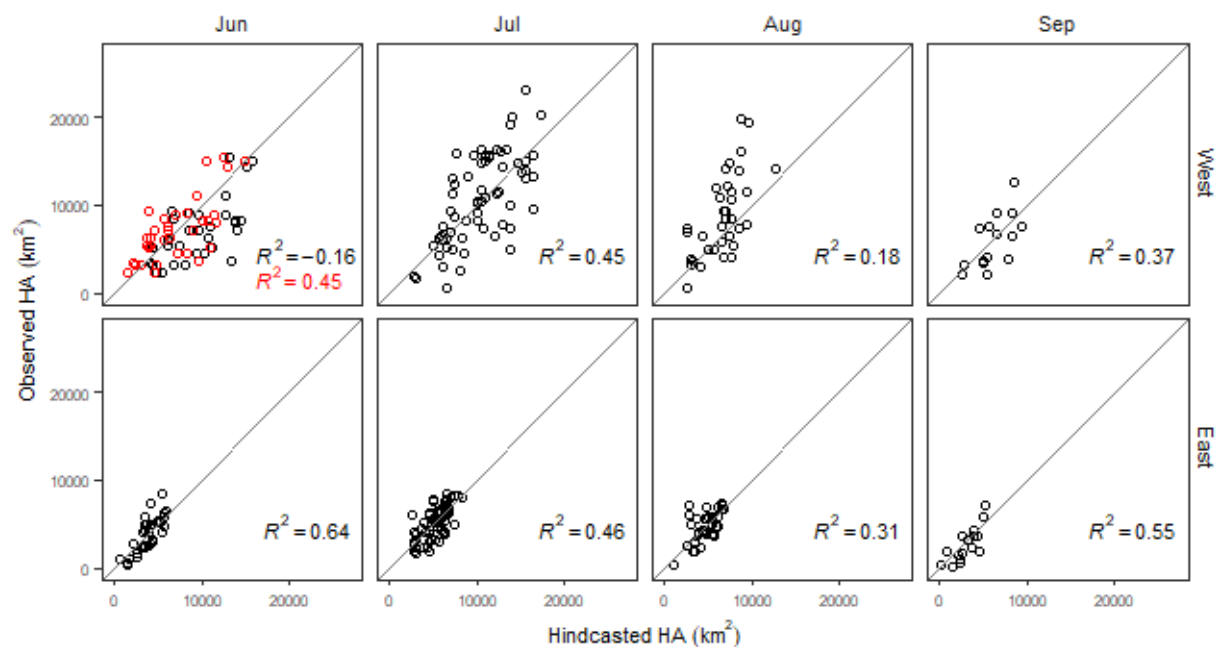

Figure S2.3: Month by month comparison of observed with hindcasted (black) and bias-adjusted hindcasted (red) averaged HA in the west and east sections. Diagonal lines represent perfect prediction.

### S3 Linear regressions for predicting June-September MAR flow and loading

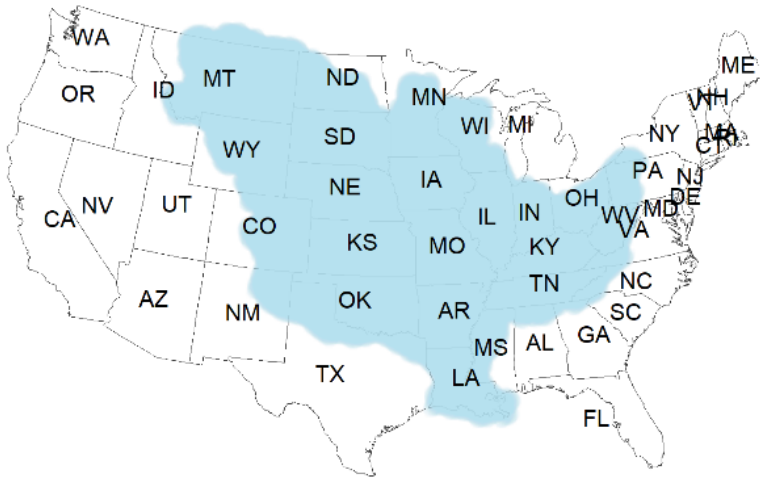

Figure S3.1: Map of MAR Basin (light blue filled) used in estimation monthly precipitation and temperature.

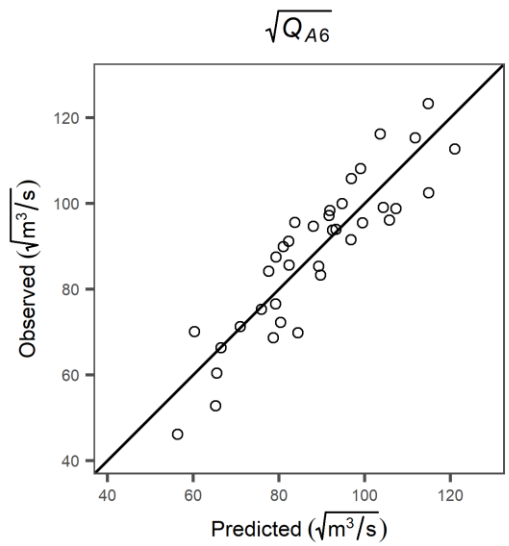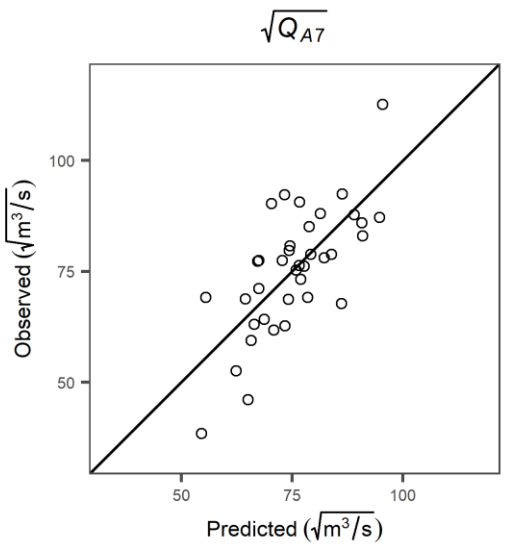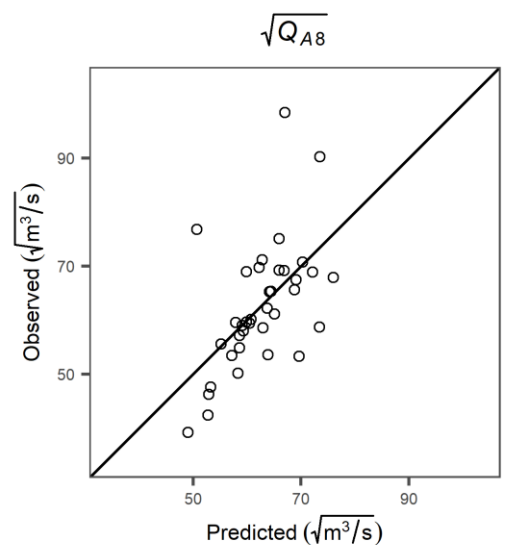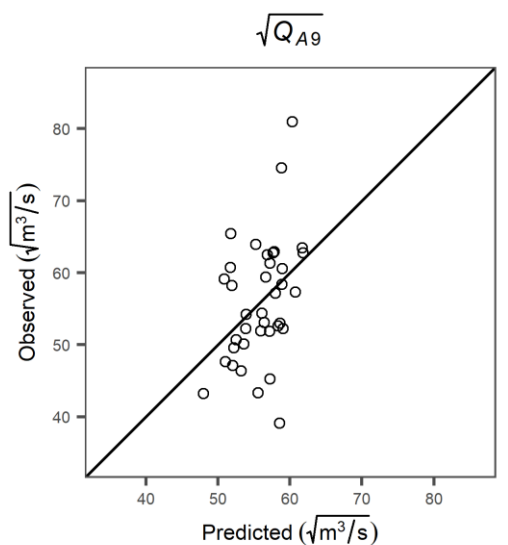

**Figure S3.2: Observed versus predicted by regressions square-root transformed Atchafalaya River monthly average discharge. Subscript numbers indicate months.**

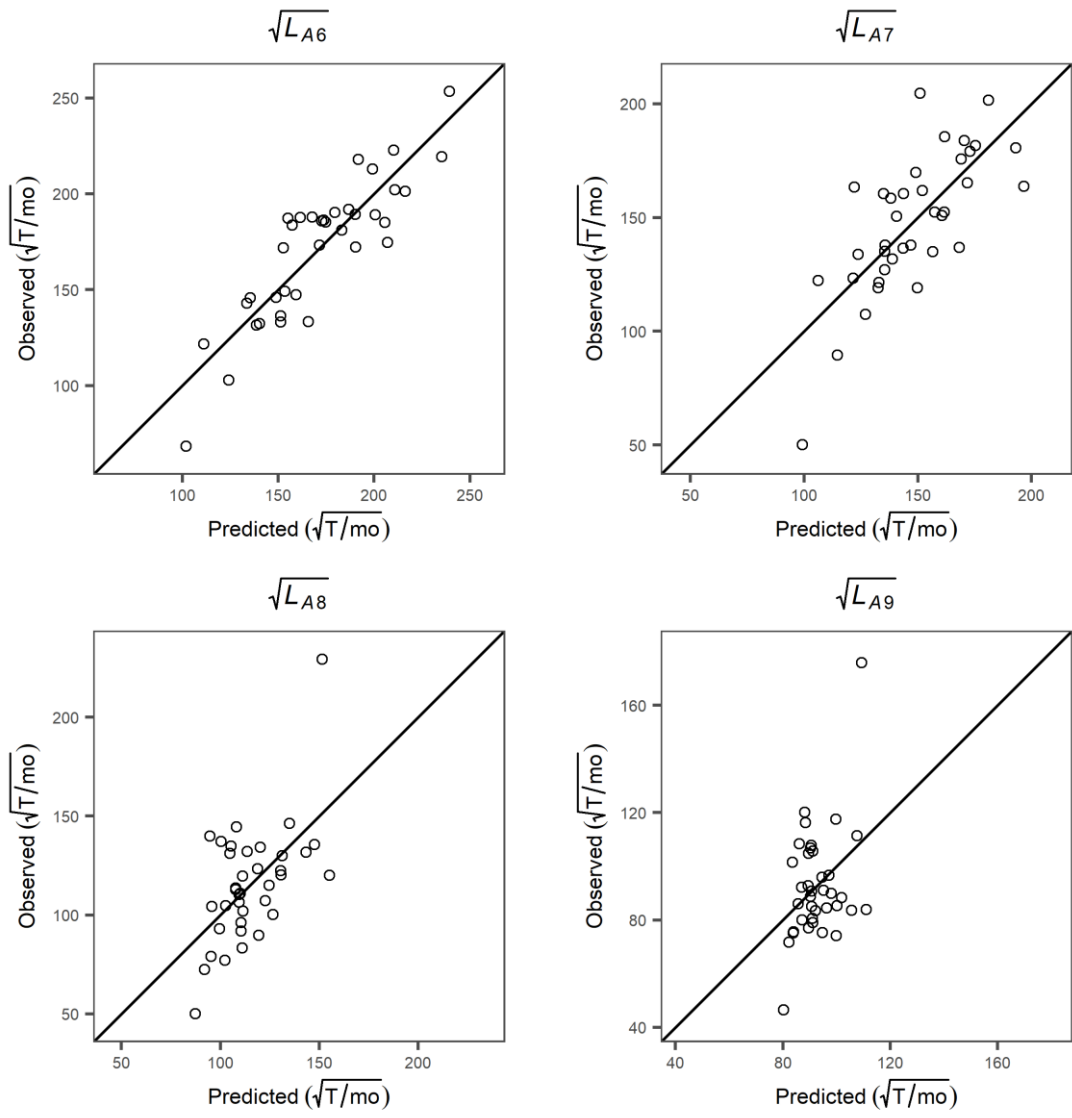

**Figure S3.3: Observed versus predicted by regressions square-root transformed Atchafalaya River monthly average nitrogen loading. Subscript numbers indicate months.**

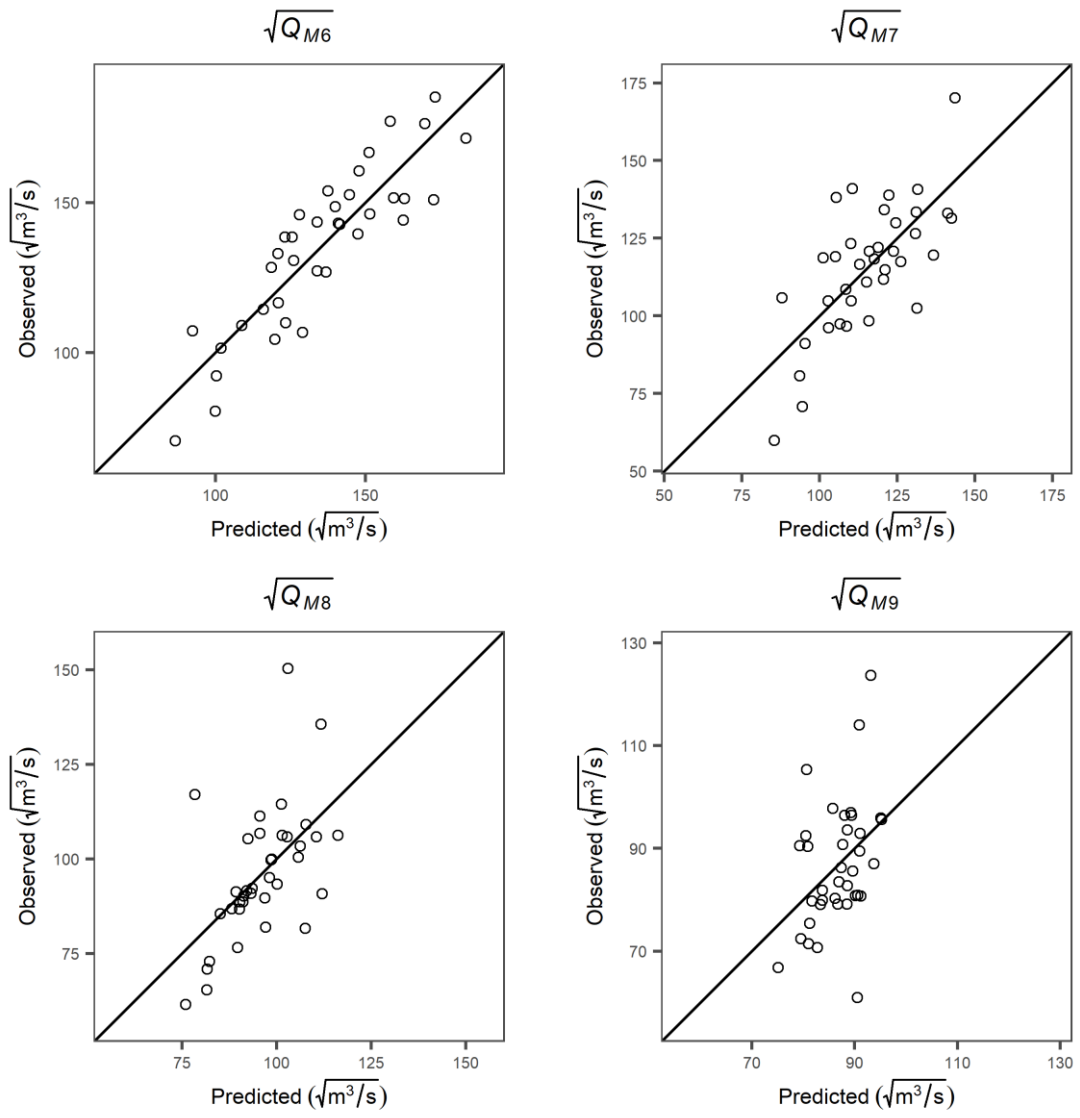

**Figure S3.4: Observed versus predicted by regressions square-root transformed Mississippi River monthly average discharge. Subscript numbers indicate months.**



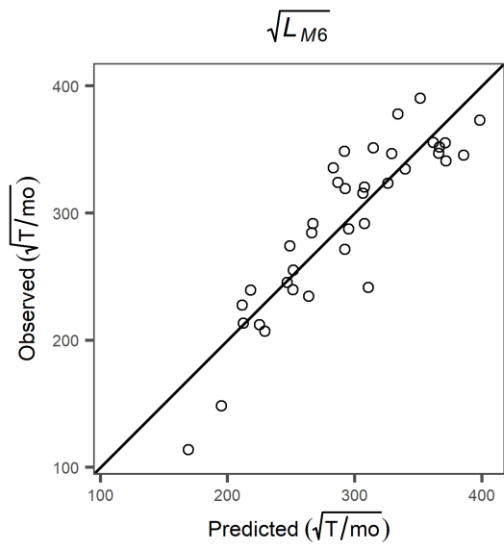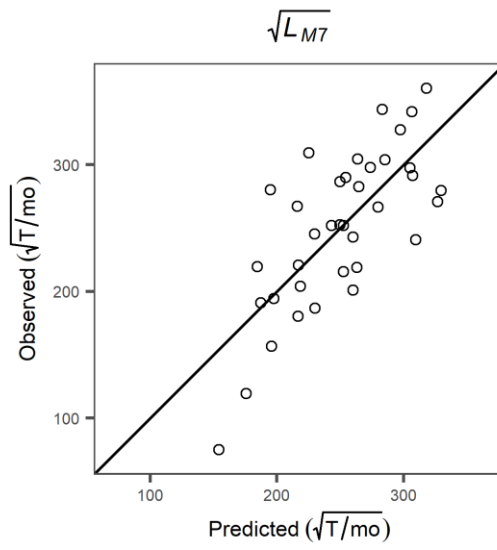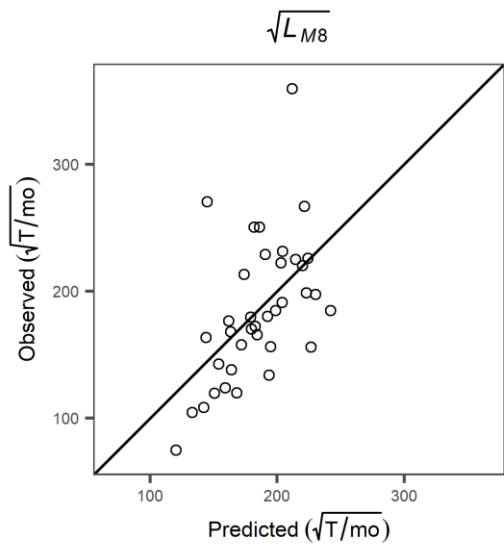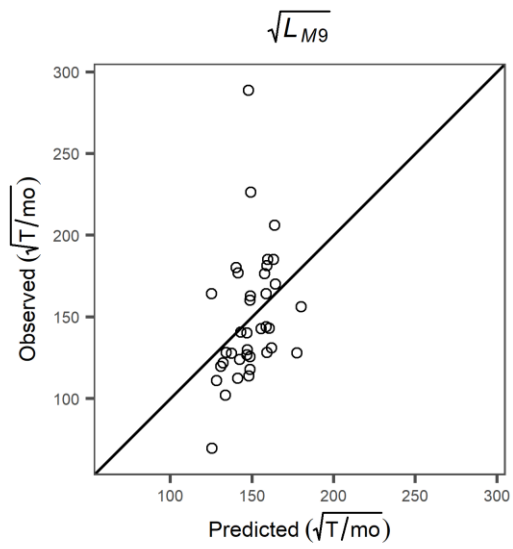

**Figure S3.5: Observed versus predicted by regressions square-root transformed Mississippi River monthly average nitrogen loading. Subscript numbers indicate months.**

**Table S3.1: Predicted by the regressions (pre) and observed (obs) monthly Atchafalaya River discharge and nitrogen loading**

| Year | Atchafalaya River             |       |      |       |      |      |      |      |                |       |       |       |       |       |       |       |
|------|-------------------------------|-------|------|-------|------|------|------|------|----------------|-------|-------|-------|-------|-------|-------|-------|
|      | Discharge (m <sup>3</sup> /s) |       |      |       |      |      |      |      | Loading (t/mo) |       |       |       |       |       |       |       |
|      | Jun                           |       | Jul  |       | Aug  |      | Sep  |      | Jun            |       | Jul   |       | Aug   |       | Sep   |       |
|      | pre                           | obs   | pre  | obs   | pre  | obs  | pre  | obs  | pre            | obs   | pre   | obs   | pre   | obs   | pre   | obs   |
| 1980 | 6267                          | 5860  | 4719 | 4130  | 3429 | 3270 | 3466 | 3410 | 23542          | 22304 | 18328 | 16168 | 11974 | 12183 | 8138  | 11426 |
| 1981 | 7743                          | 8970  | 5517 | 6360  | 3872 | 4870 | 2699 | 3390 | 28095          | 35351 | 20638 | 25812 | 10072 | 18866 | 7413  | 11767 |
| 1982 | 8692                          | 8820  | 7035 | 6220  | 4148 | 4270 | 3805 | 4030 | 32188          | 36213 | 23060 | 26246 | 10964 | 17236 | 7757  | 14451 |
| 1983 | 13167                         | 15200 | 6754 | 6100  | 5385 | 3450 | 3088 | 1880 | 57267          | 64260 | 38645 | 26815 | 24069 | 14452 | 12311 | 7060  |
| 1984 | 8963                          | 9990  | 5293 | 6010  | 4229 | 3740 | 3273 | 2050 | 39694          | 45366 | 28585 | 30918 | 20541 | 17382 | 11149 | 7000  |
| 1985 | 5756                          | 5670  | 4409 | 3980  | 3270 | 2860 | 3360 | 3270 | 22140          | 21315 | 17544 | 14186 | 12186 | 8462  | 8218  | 8258  |
| 1986 | 6284                          | 7650  | 4550 | 5070  | 3434 | 3010 | 2756 | 2570 | 26063          | 35274 | 19776 | 22708 | 11990 | 11333 | 8144  | 7891  |
| 1987 | 6180                          | 4710  | 5014 | 3820  | 3401 | 2520 | 2725 | 2460 | 22852          | 18584 | 17639 | 14776 | 9903  | 8680  | 7347  | 7414  |
| 1988 | 3175                          | 2130  | 2972 | 1480  | 2406 | 1540 | 3427 | 1530 | 10378          | 4674  | 9845  | 2525  | 7629  | 2524  | 6431  | 2164  |
| 1989 | 6758                          | 8310  | 5372 | 8520  | 3579 | 3560 | 3340 | 3960 | 19207          | 17314 | 15313 | 17902 | 8453  | 5270  | 6770  | 5147  |
| 1990 | 10735                         | 13500 | 8260 | 6890  | 4724 | 4310 | 2673 | 3690 | 34861          | 36813 | 24760 | 23264 | 12379 | 14335 | 8289  | 11185 |
| 1991 | 11184                         | 9240  | 7418 | 4590  | 4849 | 2840 | 2874 | 2510 | 40243          | 35772 | 28265 | 18731 | 16010 | 10062 | 9599  | 8104  |
| 1992 | 3628                          | 4920  | 3084 | 4780  | 2568 | 5900 | 2587 | 3500 | 12358          | 14835 | 11260 | 14967 | 8974  | 19610 | 6980  | 10322 |
| 1993 | 9887                          | 9120  | 5878 | 8220  | 4490 | 9690 | 3639 | 6560 | 46759          | 40591 | 32790 | 40674 | 22914 | 52641 | 11934 | 30940 |
| 1994 | 6458                          | 5220  | 4147 | 4740  | 3489 | 3480 | 3436 | 2810 | 22887          | 17737 | 18342 | 18275 | 15049 | 11522 | 9259  | 7145  |
| 1995 | 12495                         | 13300 | 8971 | 7610  | 5202 | 4750 | 3146 | 2960 | 44192          | 49676 | 29920 | 32104 | 12878 | 17483 | 8474  | 6990  |
| 1996 | 9797                          | 11700 | 6038 | 5810  | 4463 | 4790 | 3692 | 3290 | 36749          | 47578 | 26113 | 23262 | 14439 | 18030 | 9041  | 8291  |
| 1997 | 7001                          | 9140  | 5553 | 6520  | 3653 | 3530 | 3401 | 2770 | 24710          | 33762 | 19058 | 25115 | 12393 | 10400 | 8294  | 6250  |
| 1998 | 6777                          | 7330  | 4941 | 8150  | 3586 | 4760 | 2902 | 2730 | 29851          | 34567 | 22752 | 41918 | 18203 | 21440 | 10359 | 7807  |
| 1999 | 8043                          | 6930  | 6262 | 6220  | 3961 | 3430 | 2829 | 2150 | 36152          | 35830 | 26154 | 34465 | 17061 | 14497 | 9966  | 5503  |
| 2000 | 5037                          | 5080  | 4519 | 5980  | 3040 | 3090 | 2705 | 2220 | 18331          | 21279 | 14899 | 26722 | 9148  | 10907 | 7049  | 5731  |
| 2001 | 6556                          | 8080  | 5494 | 4720  | 3517 | 3370 | 3269 | 2690 | 24009          | 35089 | 18391 | 19025 | 10516 | 10963 | 7585  | 6419  |
| 2002 | 8433                          | 9680  | 5380 | 3940  | 4075 | 2870 | 3128 | 2700 | 30172          | 34742 | 22416 | 14215 | 14220 | 8057  | 8962  | 5683  |
| 2003 | 8552                          | 8800  | 5918 | 5370  | 4108 | 4260 | 3272 | 3760 | 29374          | 30068 | 21590 | 19023 | 11594 | 12916 | 7996  | 8610  |
| 2004 | 8394                          | 9440  | 6616 | 7750  | 4062 | 3870 | 3053 | 4090 | 30481          | 34348 | 22212 | 28843 | 11611 | 12758 | 8002  | 11012 |
| 2005 | 4412                          | 4400  | 4324 | 3540  | 2835 | 2270 | 2904 | 2940 | 17836          | 20465 | 14783 | 15242 | 10458 | 5964  | 7563  | 8525  |
| 2006 | 4285                          | 3650  | 3887 | 2770  | 2793 | 2140 | 2601 | 2270 | 19677          | 17509 | 16116 | 11569 | 12328 | 6941  | 8270  | 6518  |
| 2007 | 7123                          | 4880  | 5863 | 5830  | 3689 | 3620 | 3205 | 3530 | 27414          | 17792 | 20574 | 18662 | 12206 | 9270  | 8225  | 7238  |
| 2008 | 11507                         | 9760  | 7449 | 8550  | 4937 | 5010 | 3460 | 5560 | 42257          | 34315 | 29513 | 27353 | 17005 | 15002 | 9946  | 13849 |
| 2009 | 9380                          | 11200 | 5754 | 5670  | 4347 | 4800 | 3232 | 3910 | 33557          | 32794 | 24497 | 18261 | 15529 | 13244 | 9429  | 9351  |
| 2010 | 9360                          | 8380  | 6209 | 7240  | 4339 | 5640 | 3325 | 3940 | 36202          | 29711 | 25764 | 22795 | 14119 | 15261 | 8926  | 9224  |
| 2011 | 14625                         | 12700 | 8231 | 7390  | 5770 | 4610 | 3474 | 3670 | 55333          | 48184 | 37284 | 32661 | 21790 | 18430 | 11565 | 12412 |
| 2012 | 4256                          | 2790  | 4230 | 2130  | 2783 | 1800 | 2303 | 1870 | 15399          | 10608 | 13139 | 8026  | 9070  | 6259  | 7018  | 5664  |
| 2013 | 10871                         | 9810  | 7915 | 7710  | 4762 | 4550 | 3486 | 2730 | 44454          | 40902 | 30744 | 33015 | 17231 | 16925 | 10024 | 7293  |
| 2014 | 6012                          | 7090  | 4552 | 6010  | 3350 | 3550 | 3821 | 3940 | 23275          | 29576 | 18193 | 25791 | 12111 | 12324 | 8189  | 11632 |
| 2015 | 13207                         | 10500 | 9104 | 12700 | 5393 | 8150 | 3180 | 2820 | 42856          | 30497 | 28995 | 33812 | 11672 | 20916 | 8025  | 5934  |
| 2016 | 7966                          | 7280  | 6164 | 4790  | 3939 | 5070 | 2682 | 4280 | 25352          | 21761 | 19241 | 17377 | 11080 | 18220 | 7801  | 13529 |

**Table S3.2: Predicted by the regressions (pre) and observed (obs) monthly Mississippi River discharge and nitrogen loading**

| Year | Mississippi River             |       |       |       |       |       |      |       |                |        |        |        |       |        |       |       |
|------|-------------------------------|-------|-------|-------|-------|-------|------|-------|----------------|--------|--------|--------|-------|--------|-------|-------|
|      | Discharge (m <sup>3</sup> /s) |       |       |       |       |       |      |       | Loading (t/mo) |        |        |        |       |        |       |       |
|      | Jun                           |       | Jul   |       | Aug   |       | Sep  |       | Jun            |        | Jul    |        | Aug   |        | Sep   |       |
|      | pre                           | obs   | pre   | obs   | pre   | obs   | pre  | obs   | pre            | obs    | pre    | obs    | pre   | obs    | pre   | obs   |
| 1980 | 14630                         | 13600 | 11343 | 9490  | 8135  | 7860  | 8274 | 8010  | 63302          | 65152  | 47753  | 41706  | 26594 | 28307  | 20013 | 31300 |
| 1981 | 17920                         | 20600 | 14115 | 14900 | 9121  | 11400 | 6541 | 8170  | 85438          | 101948 | 64589  | 84155  | 32983 | 62810  | 25417 | 34298 |
| 1982 | 19984                         | 20400 | 15303 | 14600 | 9725  | 9990  | 9036 | 9200  | 111437         | 143000 | 81310  | 92394  | 41684 | 53563  | 26813 | 42533 |
| 1983 | 30025                         | 34300 | 18650 | 14300 | 12537 | 8250  | 7422 | 6450  | 158722         | 139385 | 108588 | 78336  | 58501 | 34090  | 25718 | 20451 |
| 1984 | 20899                         | 23300 | 13811 | 14000 | 10012 | 8710  | 7839 | 6850  | 98964          | 123543 | 69521  | 92867  | 39435 | 34138  | 20464 | 19808 |
| 1985 | 13430                         | 13100 | 10561 | 9260  | 7762  | 7550  | 8034 | 7330  | 63122          | 57531  | 46965  | 32609  | 26875 | 19074  | 18873 | 16327 |
| 1986 | 14582                         | 17700 | 11759 | 11800 | 8115  | 7530  | 6669 | 6360  | 80192          | 112690 | 59026  | 63614  | 32276 | 28958  | 21600 | 16855 |
| 1987 | 14336                         | 10900 | 11802 | 9360  | 8037  | 5870  | 6600 | 5690  | 69577          | 55102  | 52856  | 34909  | 28267 | 14390  | 22124 | 13905 |
| 1988 | 7504                          | 4990  | 7294  | 3600  | 5765  | 3790  | 8186 | 3720  | 28529          | 13023  | 23687  | 5649   | 14430 | 5606   | 15706 | 4847  |
| 1989 | 15744                         | 19200 | 12198 | 19900 | 8475  | 8400  | 7990 | 9310  | 60823          | 60366  | 47098  | 48845  | 25237 | 15385  | 21538 | 19664 |
| 1990 | 25018                         | 31400 | 17121 | 16000 | 11160 | 10100 | 6481 | 8560  | 123552         | 152546 | 88420  | 107462 | 45988 | 50702  | 26560 | 34340 |
| 1991 | 26414                         | 20800 | 17243 | 10500 | 11552 | 6670  | 6937 | 6260  | 137626         | 126306 | 95863  | 58028  | 51343 | 24382  | 25282 | 16435 |
| 1992 | 8525                          | 11500 | 7723  | 11200 | 6133  | 13700 | 6285 | 8200  | 45027          | 45566  | 34027  | 48241  | 20980 | 73102  | 15673 | 27006 |
| 1993 | 22938                         | 21400 | 14949 | 19300 | 10591 | 22600 | 8664 | 15300 | 115379         | 112194 | 80188  | 118201 | 44809 | 129349 | 21813 | 83362 |
| 1994 | 15222                         | 12100 | 10543 | 11000 | 8331  | 8130  | 8206 | 6550  | 52488          | 42928  | 39023  | 37795  | 23629 | 20355  | 16420 | 12330 |
| 1995 | 28816                         | 31100 | 19949 | 17700 | 12190 | 11200 | 7552 | 6980  | 148559         | 119520 | 106812 | 73396  | 52928 | 39035  | 31448 | 16402 |
| 1996 | 22845                         | 27800 | 15901 | 13800 | 10553 | 11200 | 8783 | 7580  | 108282         | 120410 | 78280  | 71102  | 41135 | 49456  | 25121 | 20769 |
| 1997 | 16390                         | 21300 | 12093 | 15200 | 8676  | 8270  | 8127 | 6530  | 71260          | 85186  | 52775  | 60286  | 29443 | 24918  | 20274 | 15357 |
| 1998 | 15885                         | 17100 | 11094 | 19100 | 8532  | 11100 | 7001 | 6390  | 70789          | 81083  | 50718  | 95731  | 30188 | 45490  | 17465 | 14843 |
| 1999 | 18721                         | 16100 | 13442 | 14600 | 9369  | 8040  | 6836 | 5000  | 106351         | 104707 | 74928  | 88893  | 41555 | 36572  | 21925 | 12957 |
| 2000 | 11823                         | 11900 | 10204 | 14100 | 7240  | 7320  | 6555 | 5110  | 47522          | 57404  | 37897  | 78568  | 20730 | 26753  | 19944 | 12637 |
| 2001 | 15158                         | 19200 | 12123 | 11000 | 8293  | 7870  | 7829 | 6270  | 85153          | 121619 | 62349  | 63865  | 33905 | 27439  | 22101 | 15801 |
| 2002 | 18892                         | 23700 | 13398 | 9700  | 9421  | 6720  | 7512 | 6270  | 94489          | 102801 | 67602  | 40437  | 37445 | 17896  | 21548 | 16069 |
| 2003 | 19866                         | 20500 | 14520 | 12500 | 9698  | 9950  | 7837 | 8770  | 85290          | 73729  | 63743  | 46583  | 33301 | 29705  | 24185 | 20424 |
| 2004 | 19567                         | 22100 | 14597 | 18000 | 9609  | 9040  | 7342 | 9560  | 82223          | 105046 | 62274  | 82273  | 32006 | 32300  | 24860 | 31175 |
| 2005 | 10357                         | 10300 | 9081  | 8310  | 6759  | 5320  | 7005 | 6700  | 44643          | 51898  | 35040  | 36541  | 20171 | 11757  | 17965 | 16424 |
| 2006 | 10063                         | 8520  | 8742  | 6520  | 6662  | 5030  | 6318 | 5250  | 50570          | 45046  | 38259  | 24619  | 22678 | 14307  | 17130 | 14367 |
| 2007 | 16629                         | 11400 | 12723 | 13600 | 8743  | 8500  | 7686 | 8240  | 96467          | 58336  | 69220  | 47943  | 37933 | 24456  | 22192 | 26493 |
| 2008 | 26572                         | 22900 | 17298 | 19800 | 11596 | 11900 | 8261 | 13000 | 134343         | 123993 | 93922  | 116997 | 50200 | 51038  | 25279 | 32924 |
| 2009 | 21873                         | 25800 | 14647 | 13200 | 10286 | 11300 | 7747 | 9310  | 93845          | 99627  | 67573  | 59025  | 37033 | 32443  | 22081 | 25662 |
| 2010 | 21729                         | 19500 | 15505 | 16900 | 10234 | 13100 | 7955 | 9400  | 94532          | 85273  | 70005  | 79933  | 36271 | 52511  | 25184 | 26967 |
| 2011 | 33637                         | 29400 | 20297 | 17300 | 13498 | 11300 | 8291 | 8640  | 130702         | 126513 | 92985  | 88569  | 48326 | 48527  | 26979 | 28920 |
| 2012 | 9983                          | 6480  | 8905  | 5010  | 6633  | 4270  | 5641 | 4470  | 38066          | 22103  | 30847  | 14271  | 17656 | 10947  | 17884 | 10418 |
| 2013 | 25395                         | 23000 | 17154 | 17800 | 11267 | 10700 | 8318 | 6520  | 133928         | 120485 | 94353  | 85009  | 49718 | 39466  | 26209 | 17208 |
| 2014 | 14058                         | 16500 | 11030 | 14200 | 7957  | 8340  | 9071 | 9140  | 61880          | 75217  | 46687  | 71543  | 26166 | 31228  | 19685 | 32470 |
| 2015 | 29842                         | 22800 | 20601 | 29000 | 12465 | 18400 | 7629 | 7450  | 138028         | 116387 | 101115 | 130076 | 49036 | 71268  | 32390 | 24406 |
| 2016 | 17926                         | 16200 | 13240 | 12300 | 9132  | 12400 | 6501 | 11100 | 87152          | 82778  | 63664  | 63570  | 34571 | 62689  | 22265 | 51302 |

## S4 Forecast skill assessment

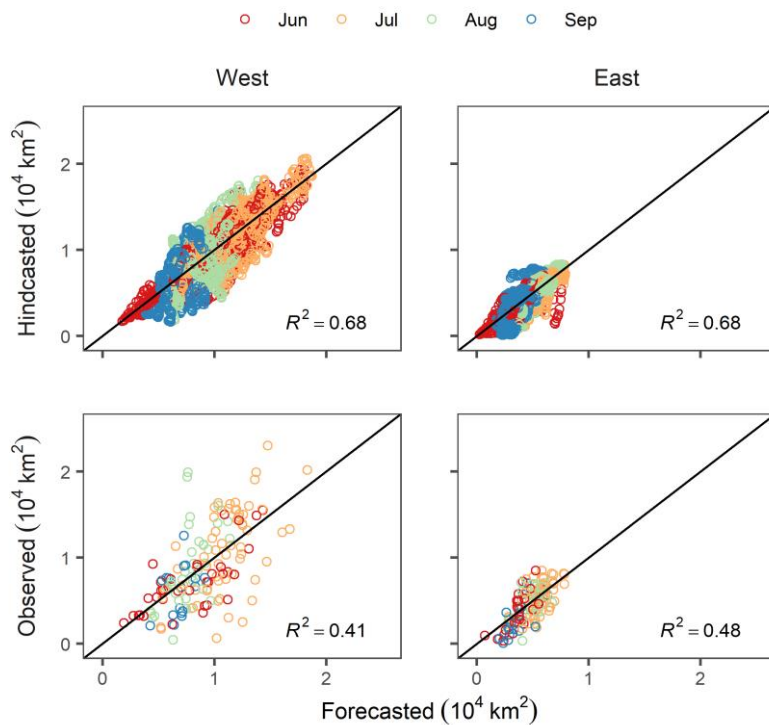

**Figure S4.1:** Averaged daily hindcasted and observed versus pseudo-forecasted HA for the west and east sections. Diagonal line represents perfect prediction.

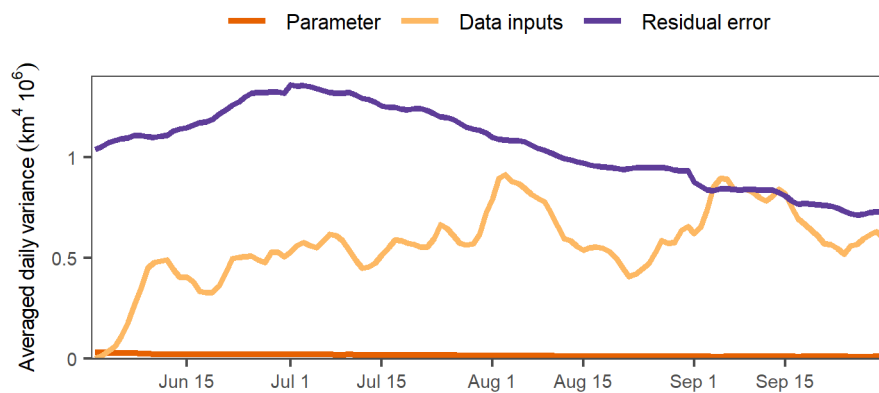

**Figure S4.2:** Averaged daily variance of total HA due to different sources of uncertainty.

## S5 HA pseudo-forecast for west and east sections of the shelf

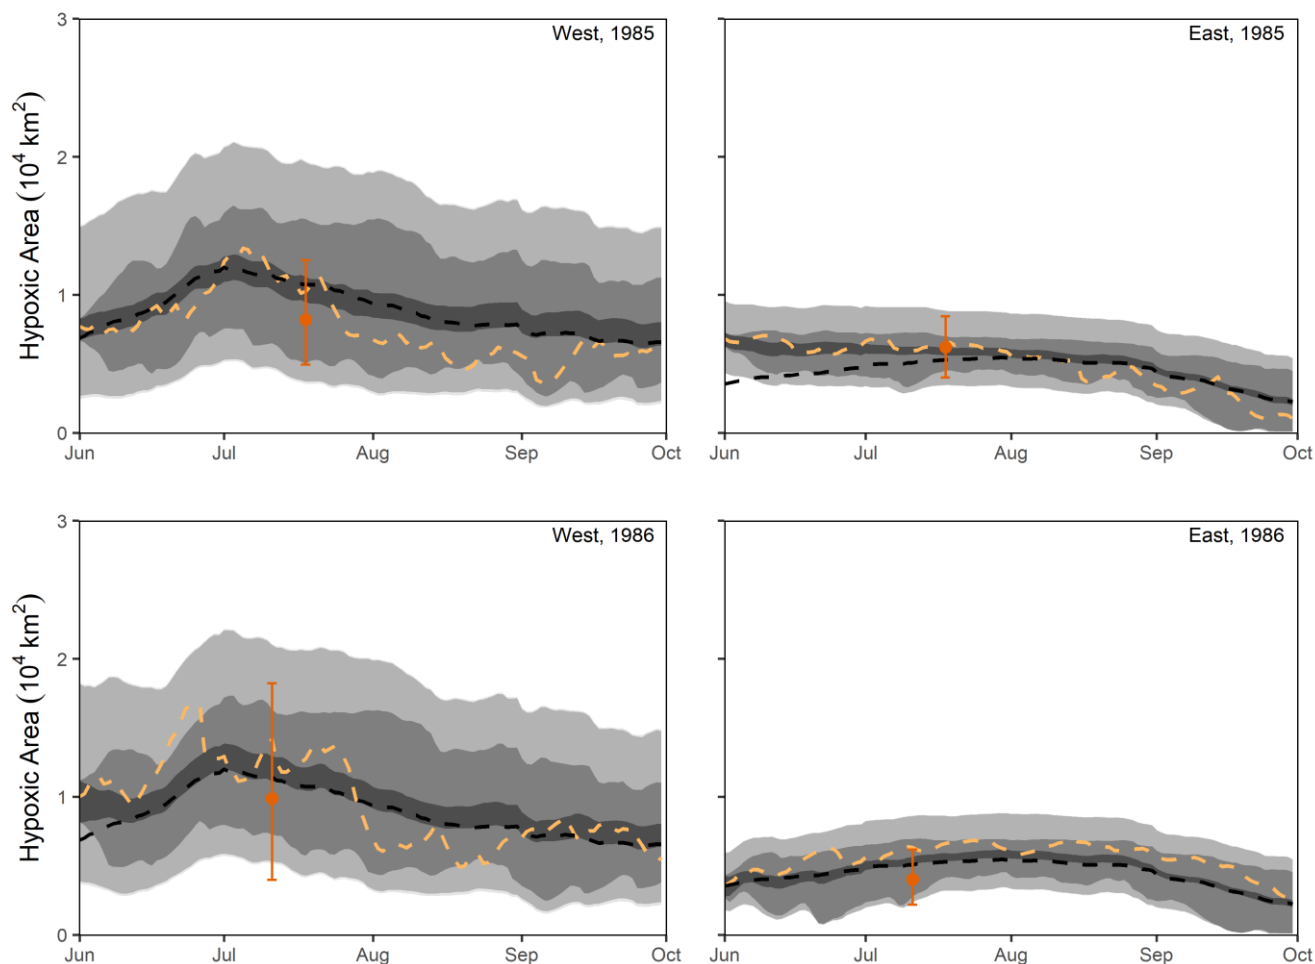

**Figure S5.1: Daily pseudo-forecasts of HA for the west and east sections in 1993 (top) and 2009 (bottom), including 95% IQR of the predictive distribution, distinguishing between i) parameter, ii) hydrometeorological inputs, iii) mechanistic model error, and iv) regression related to transformation (BWDO to HA) uncertainties (shades of gray from darkest to lightest). Yellow dashed line is hindcasted estimate, black dashed line is the 32 year average hindcast, orange points and error bars represent the mean and associated 95% confidence interval of the (geostatistically estimated) hypoxia observations.**

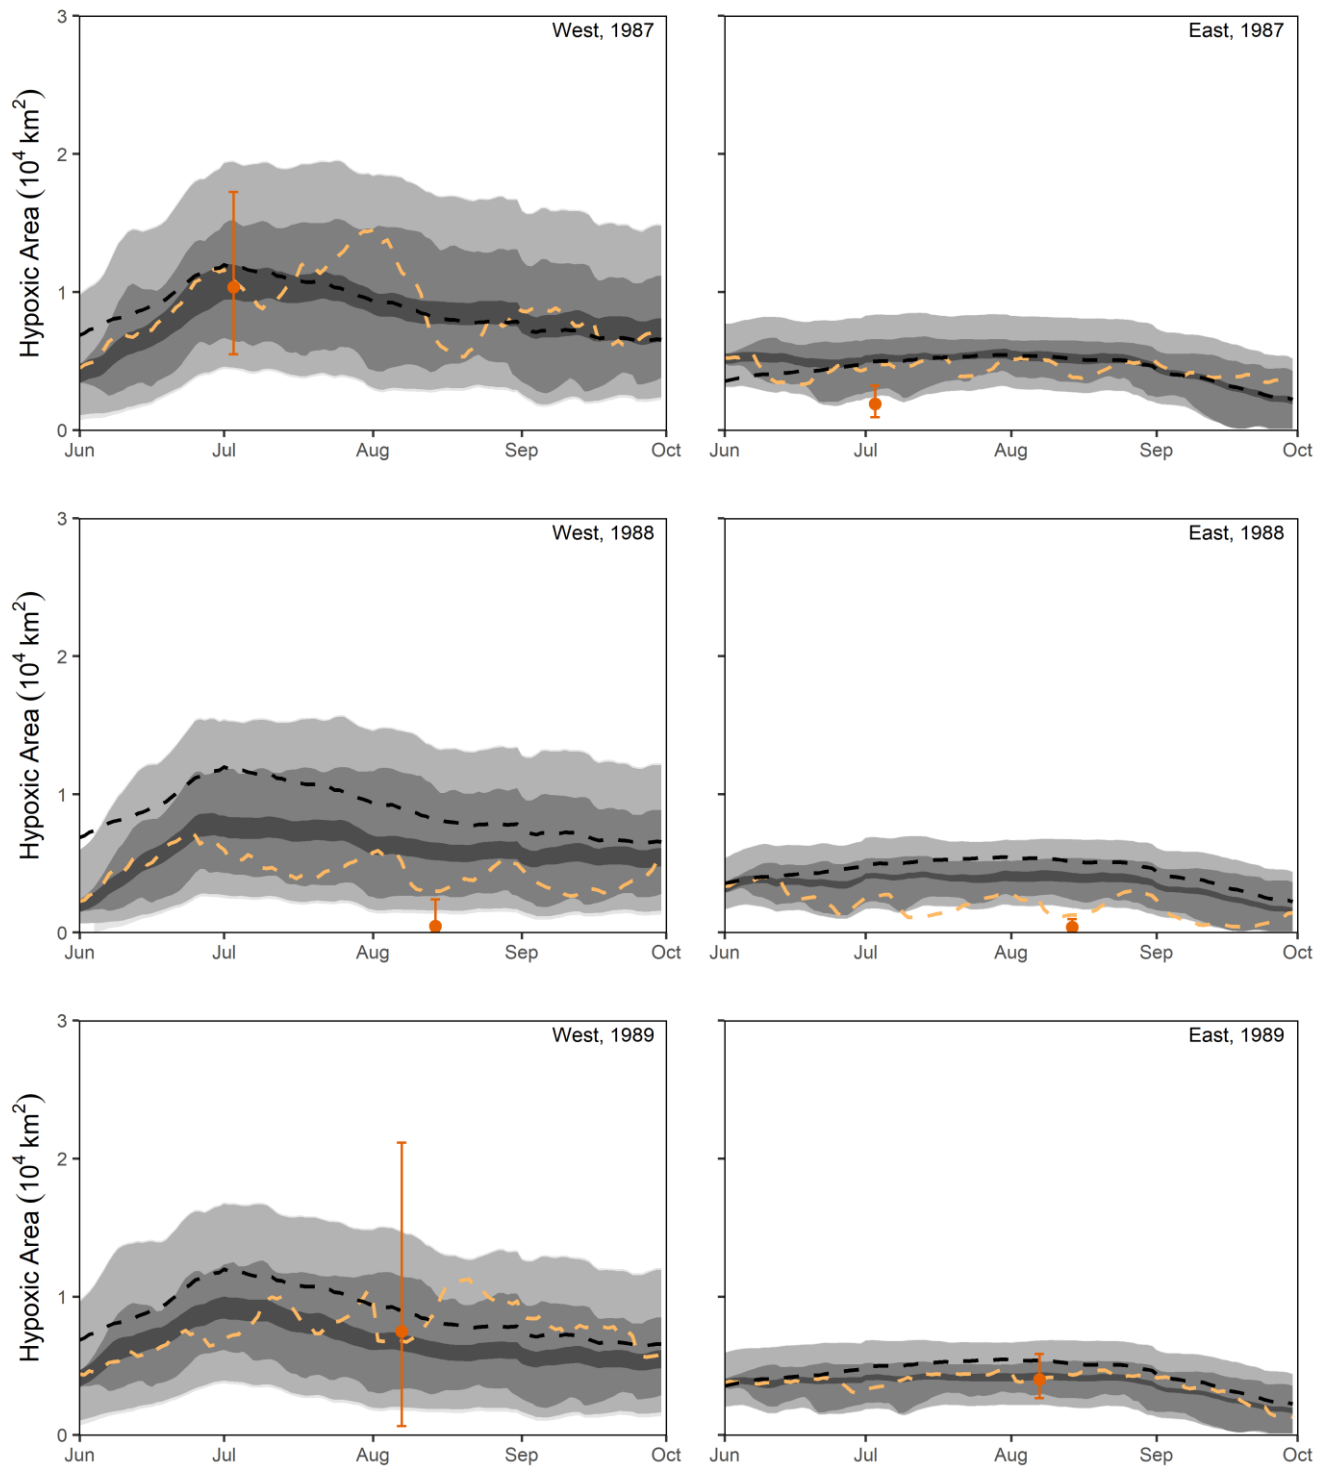

Figure S5.2: Pseudo-forecast as in Fig. S5.1 but for different years.

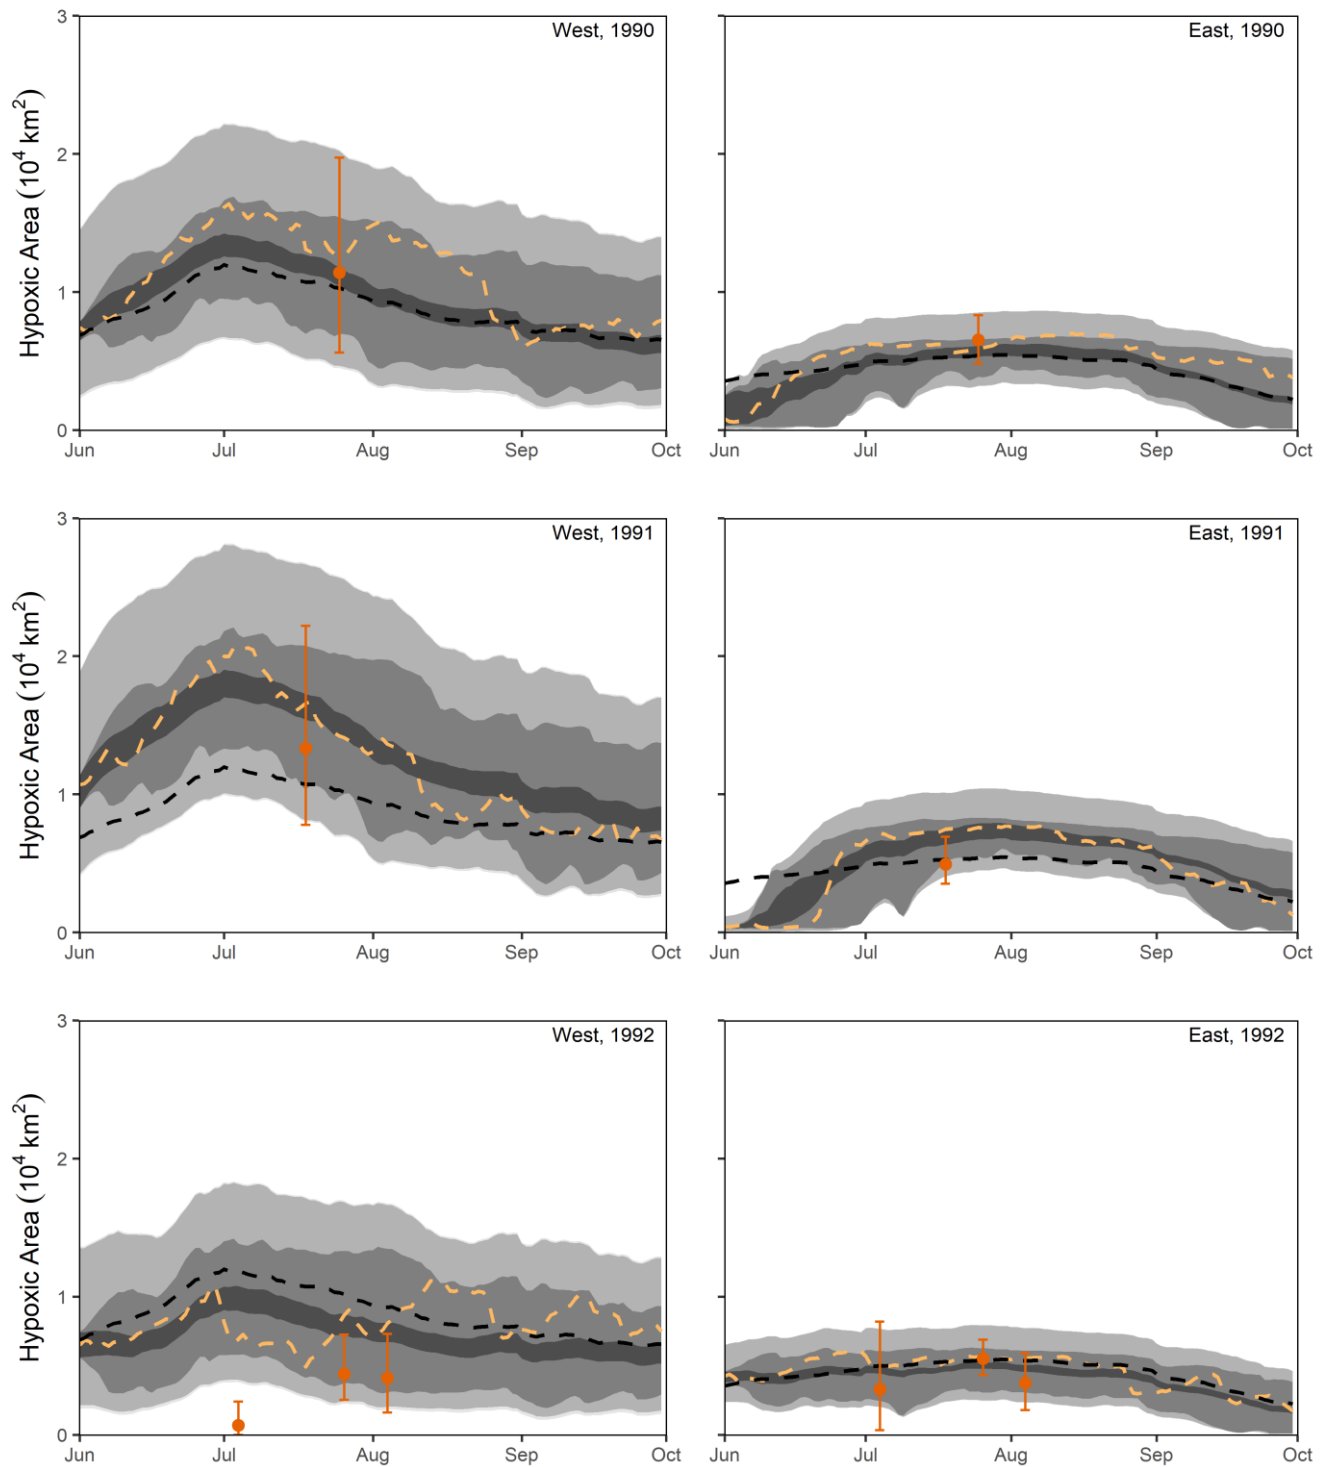

Figure S5.3: Pseudo-forecast as in Fig. S5.1 but for different years.

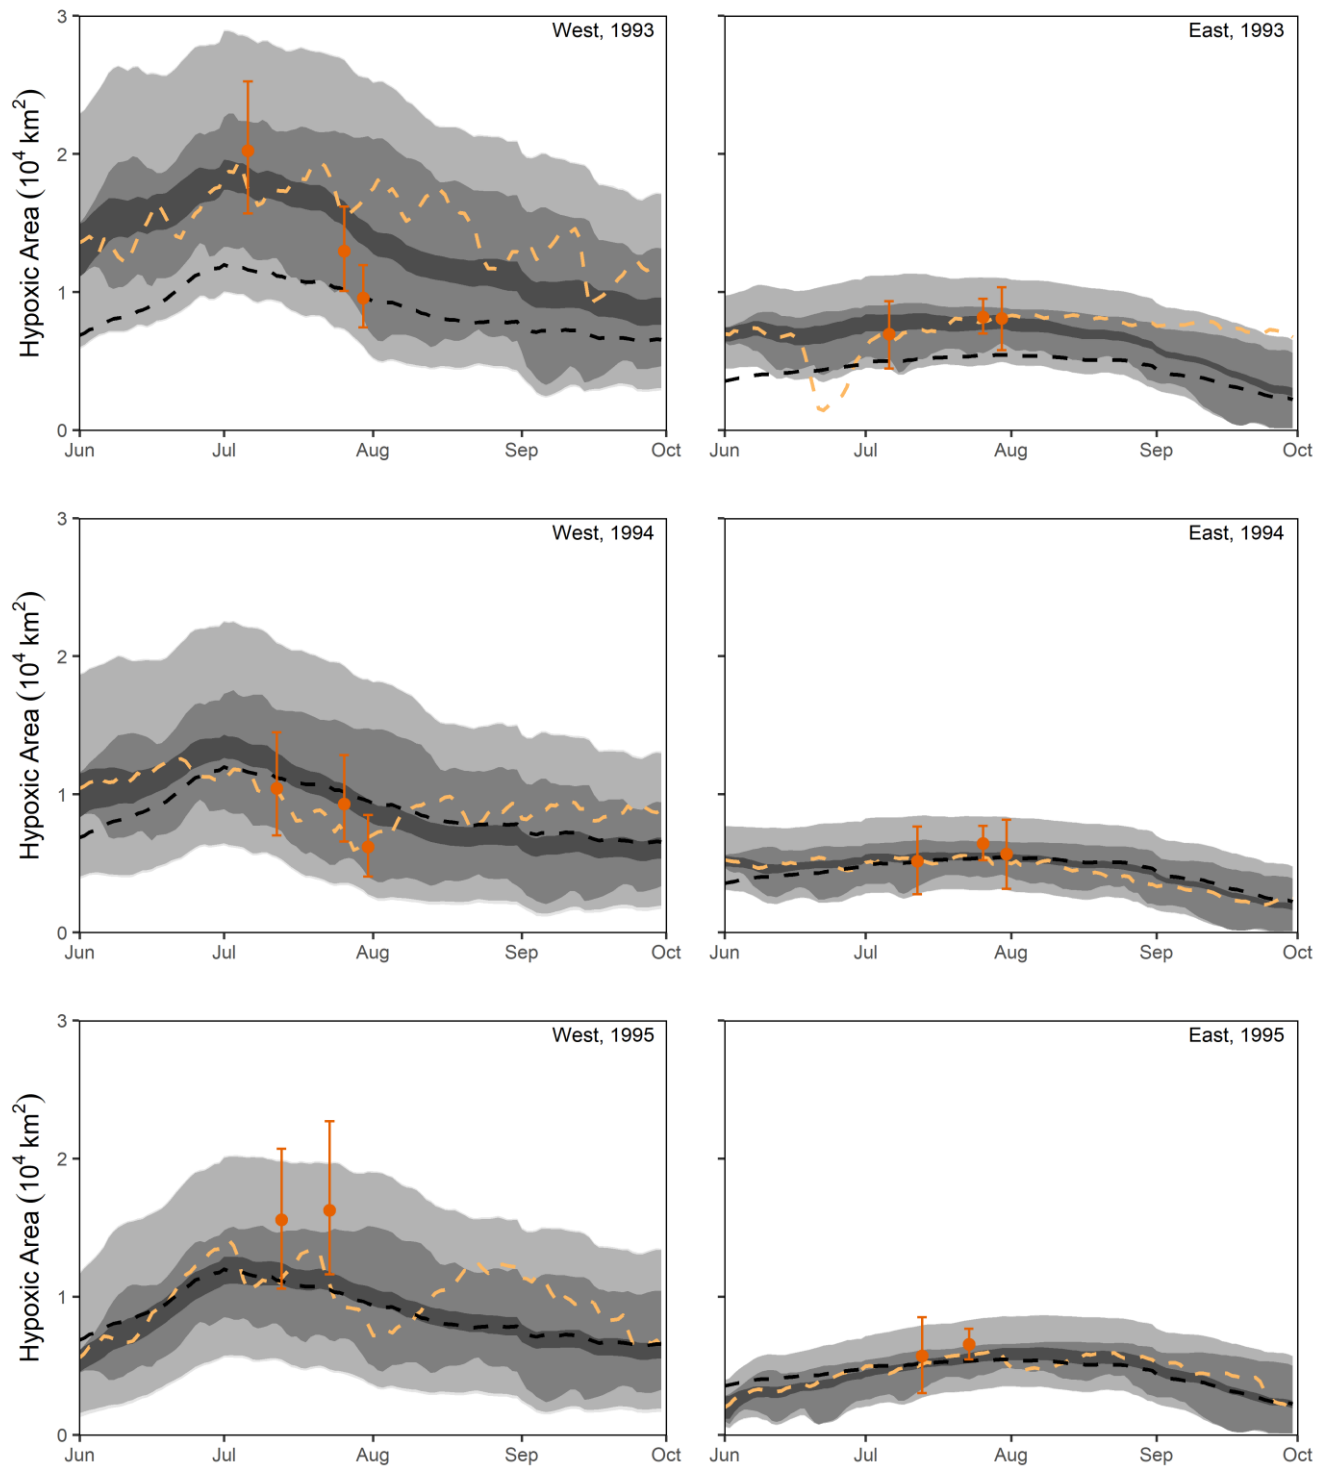

Figure S5.4: Pseudo-forecast as in Fig. S5.1 but for different years.



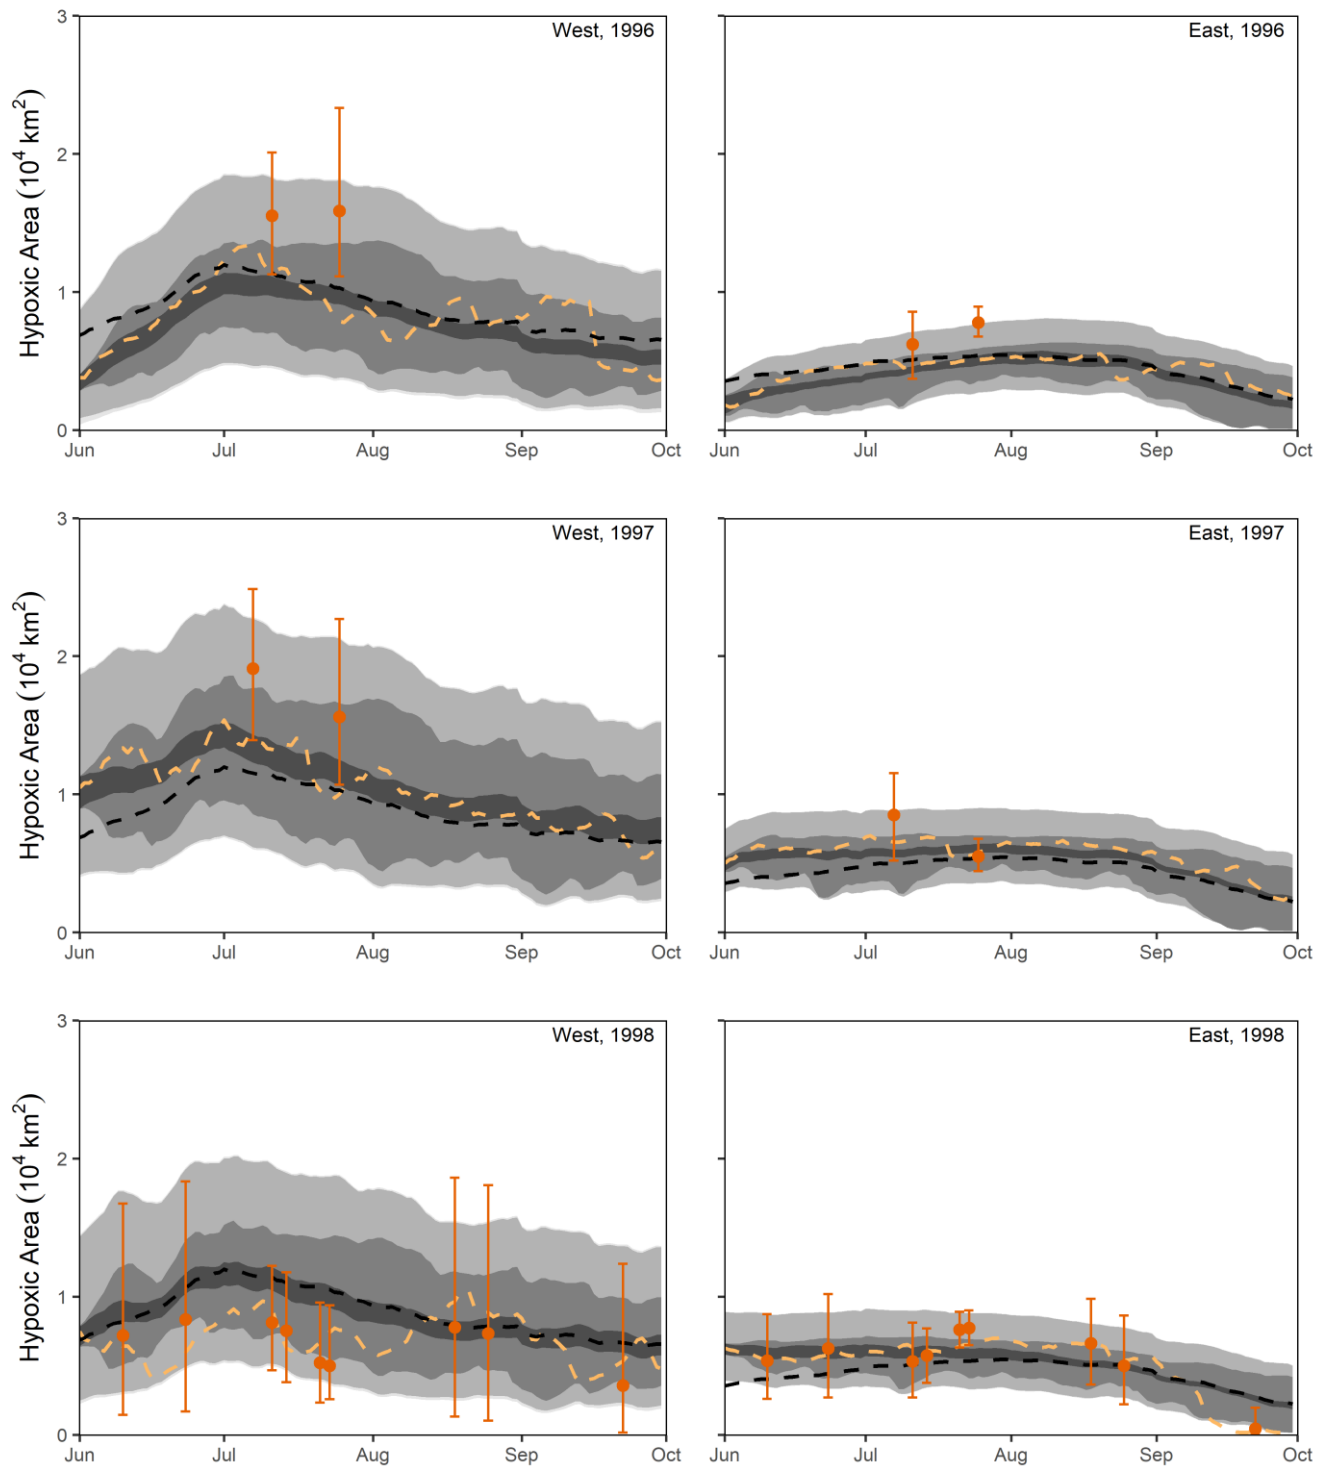

Figure S5.5: Pseudo-forecast as in Fig. S5.1 but for different years.

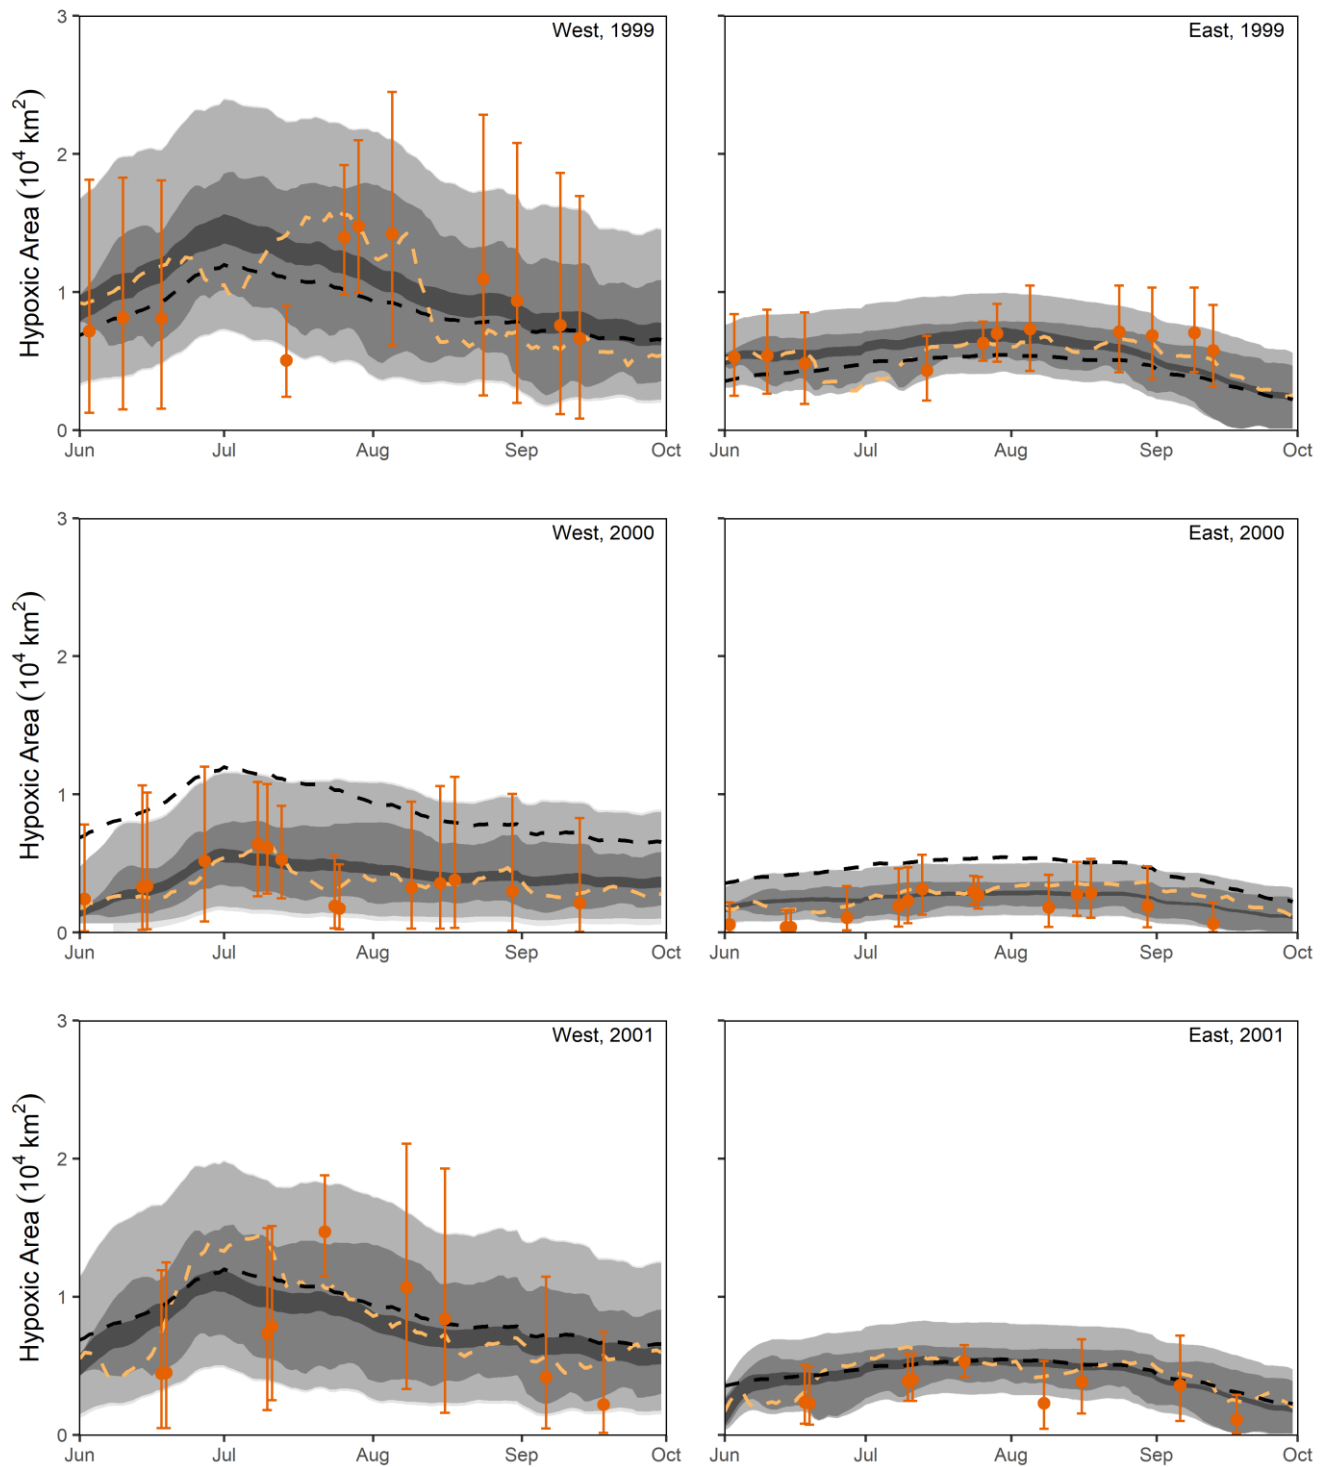

Figure S5.6: Pseudo-forecast as in Fig. S5.1 but for different years.

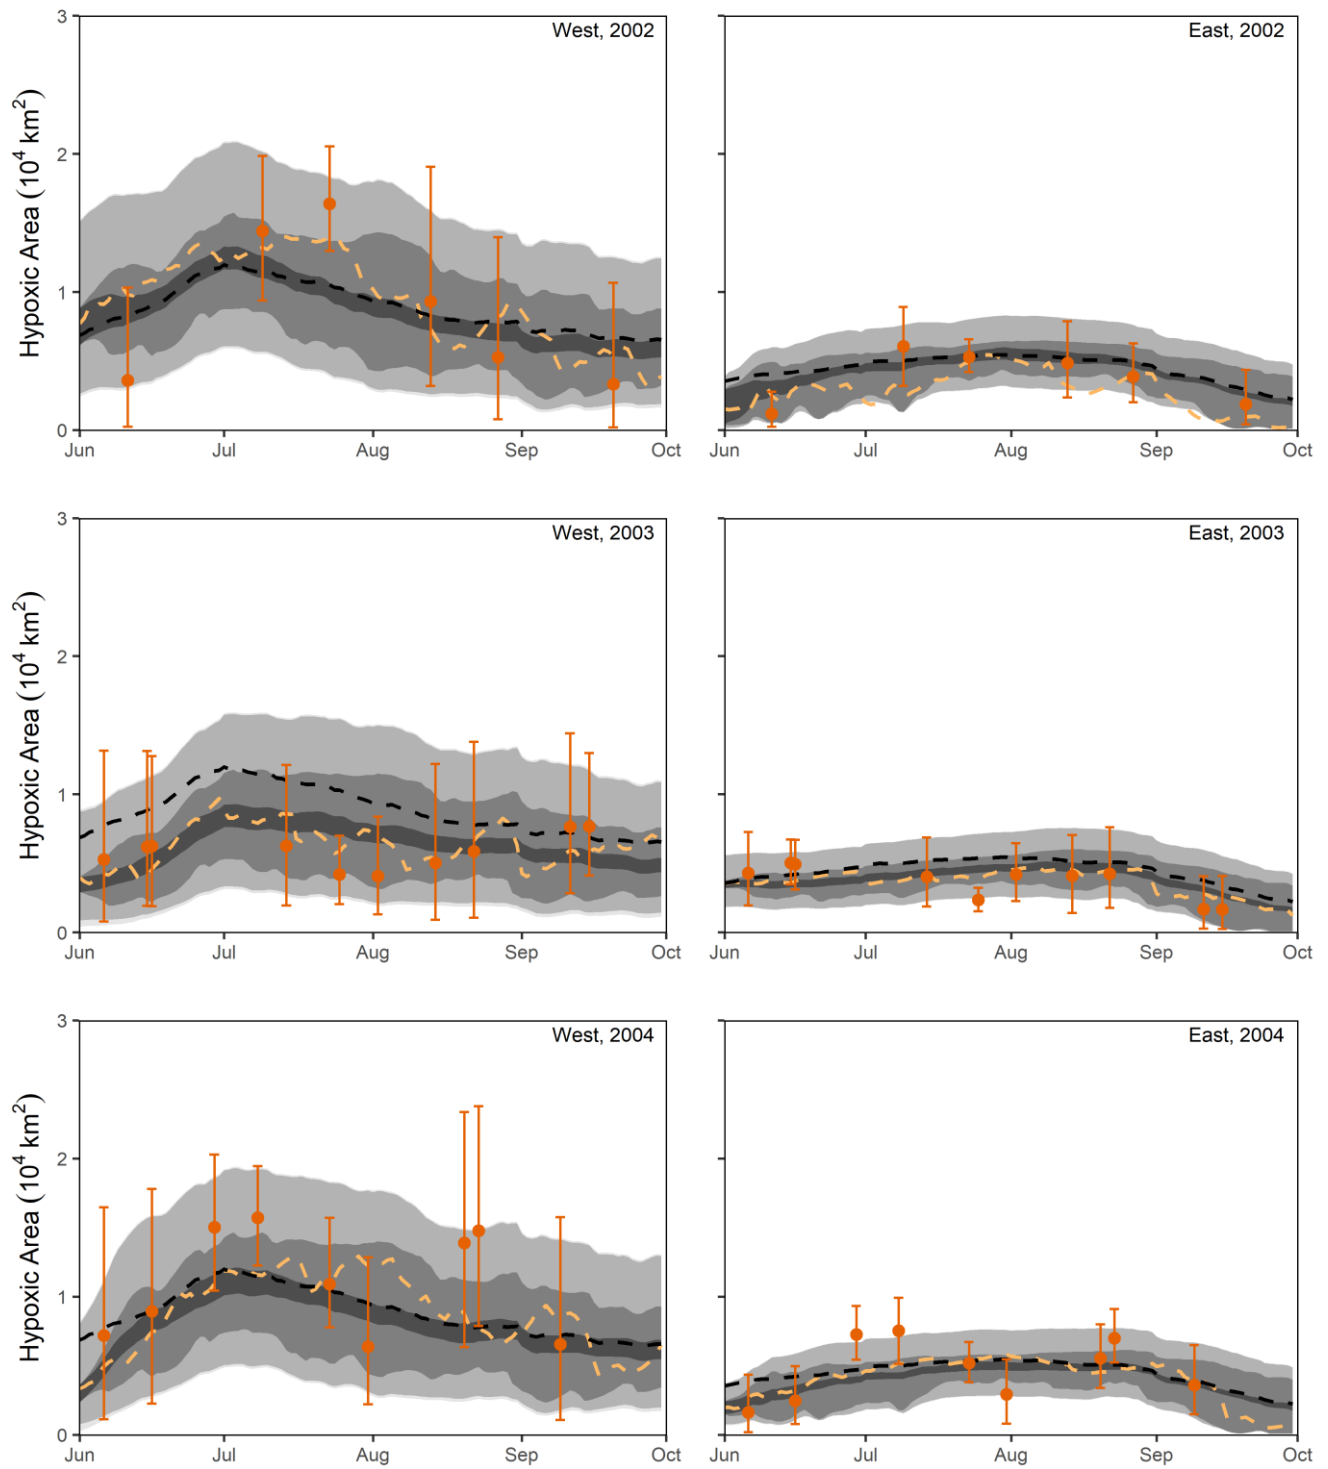

Figure S5.7: Pseudo-forecast as in Fig. S5.1 but for different years.

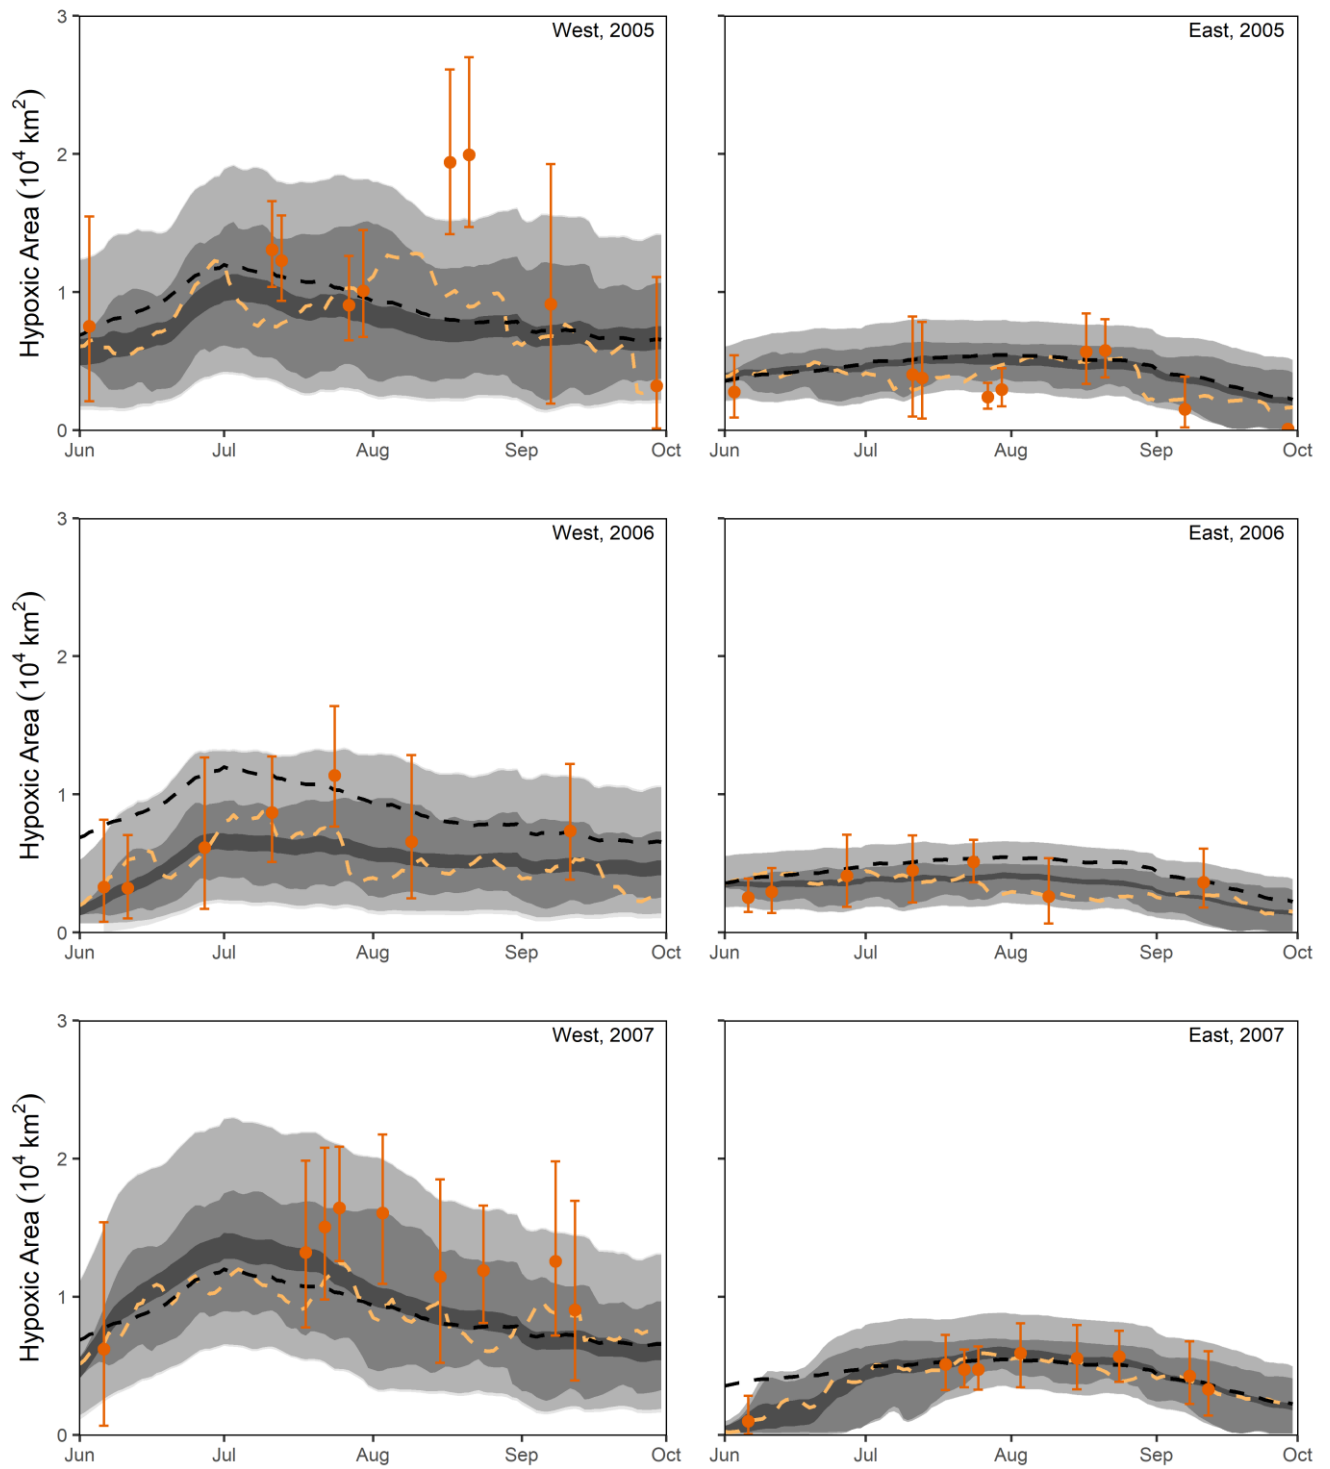

Figure S5.8: Pseudo-forecast as in Fig. S5.1 but for different years.

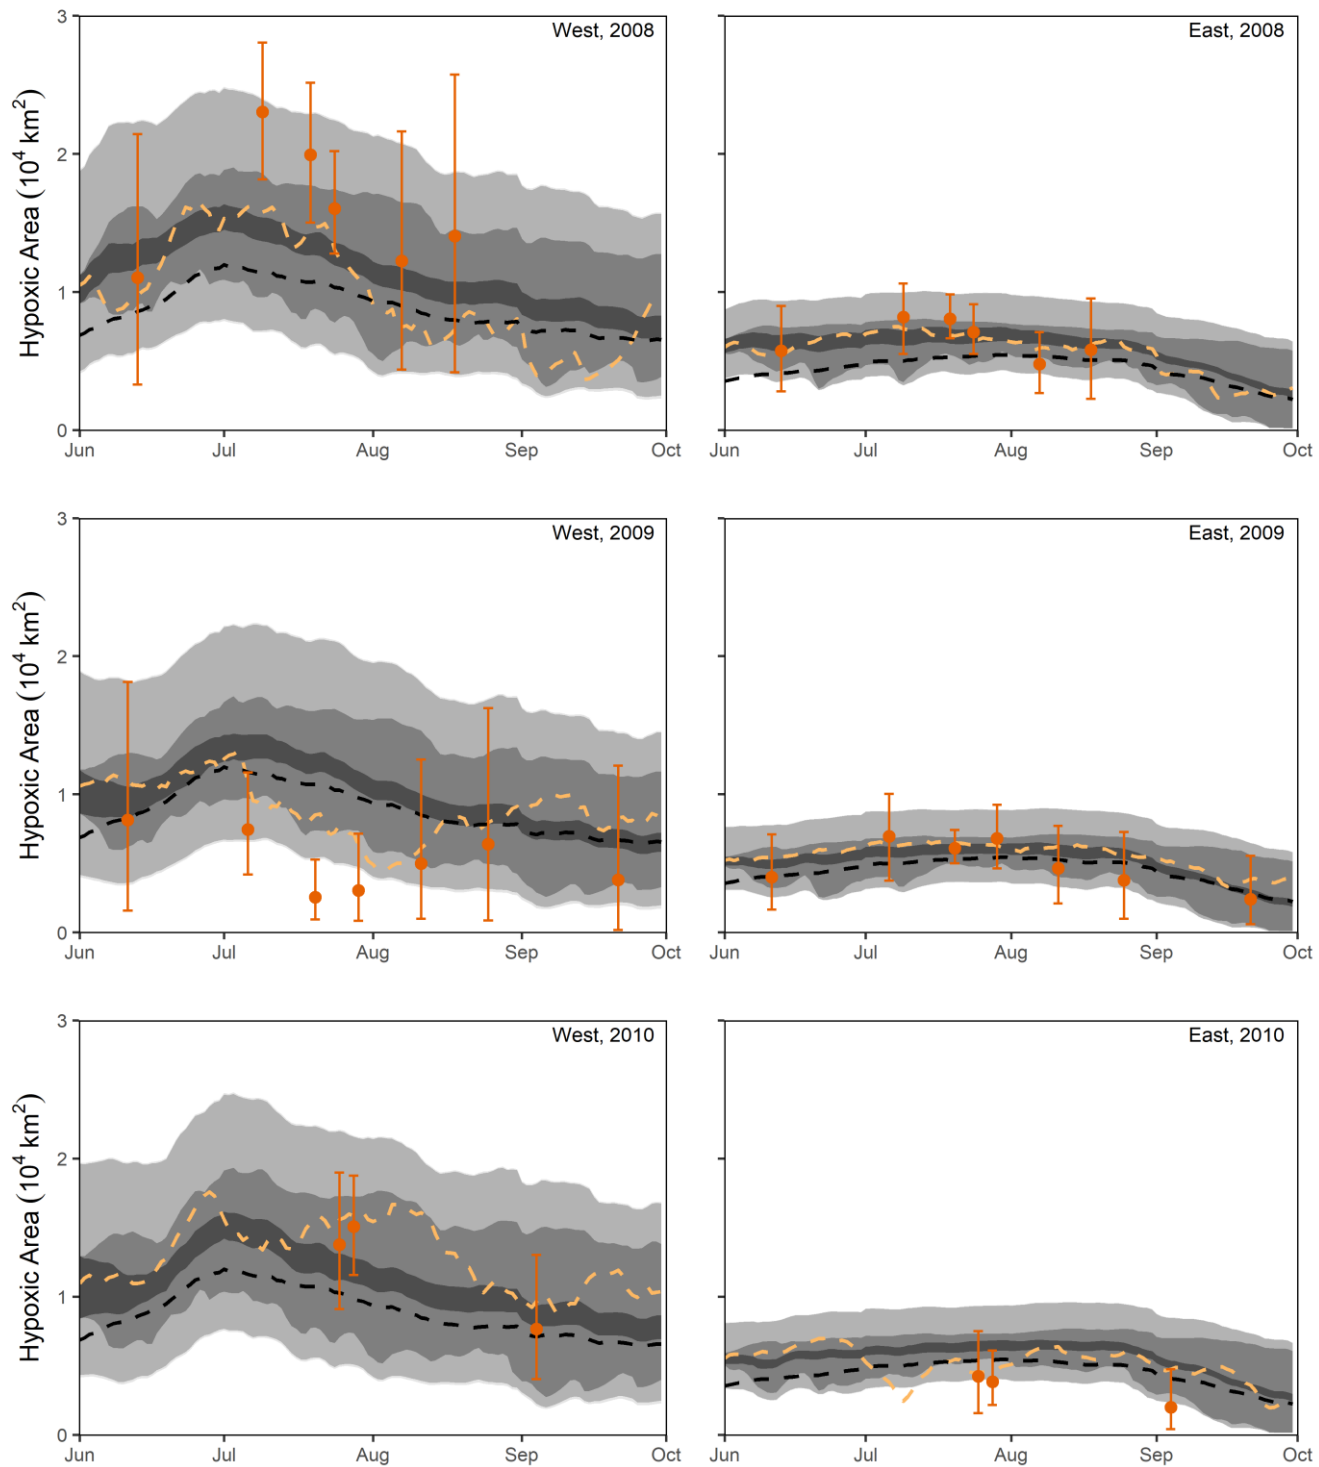

Figure S5.9: Pseudo-forecast as in Fig. S5.1 but for different years.

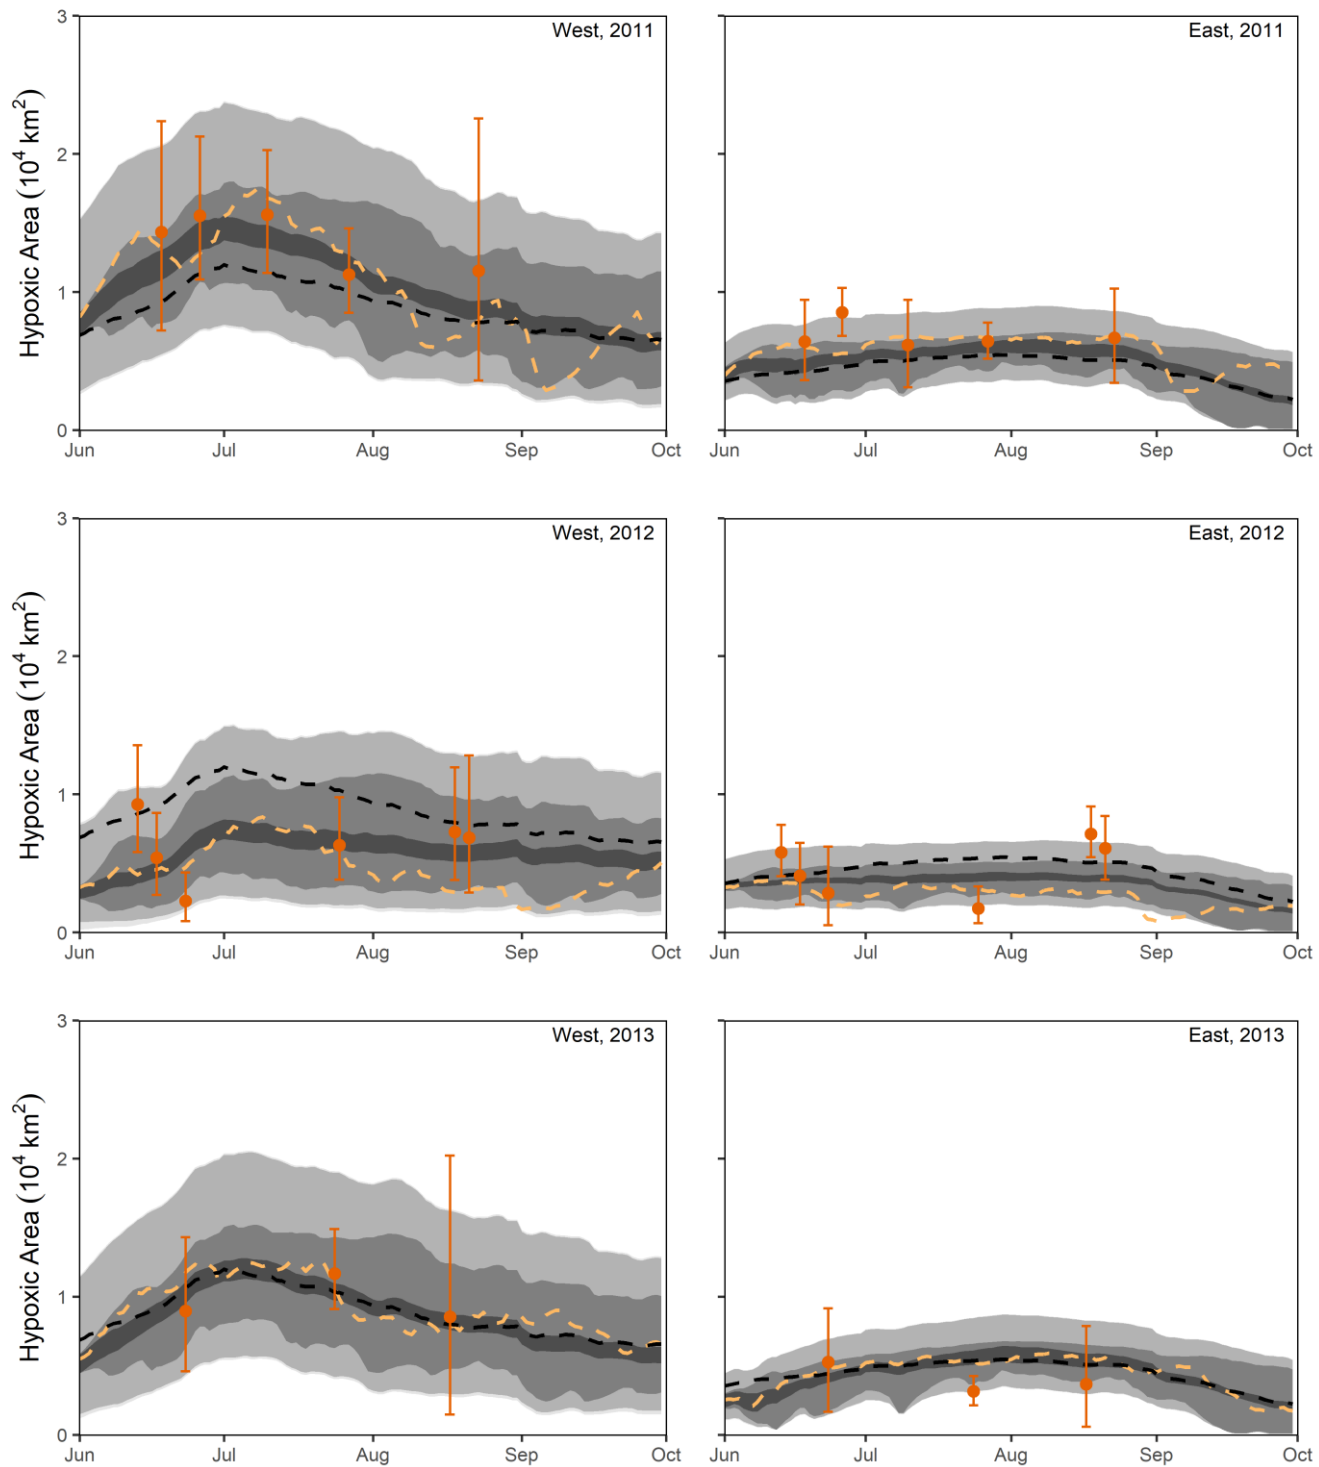

Figure S5.10: Pseudo-forecast as in Fig. S5.1 but for different years.

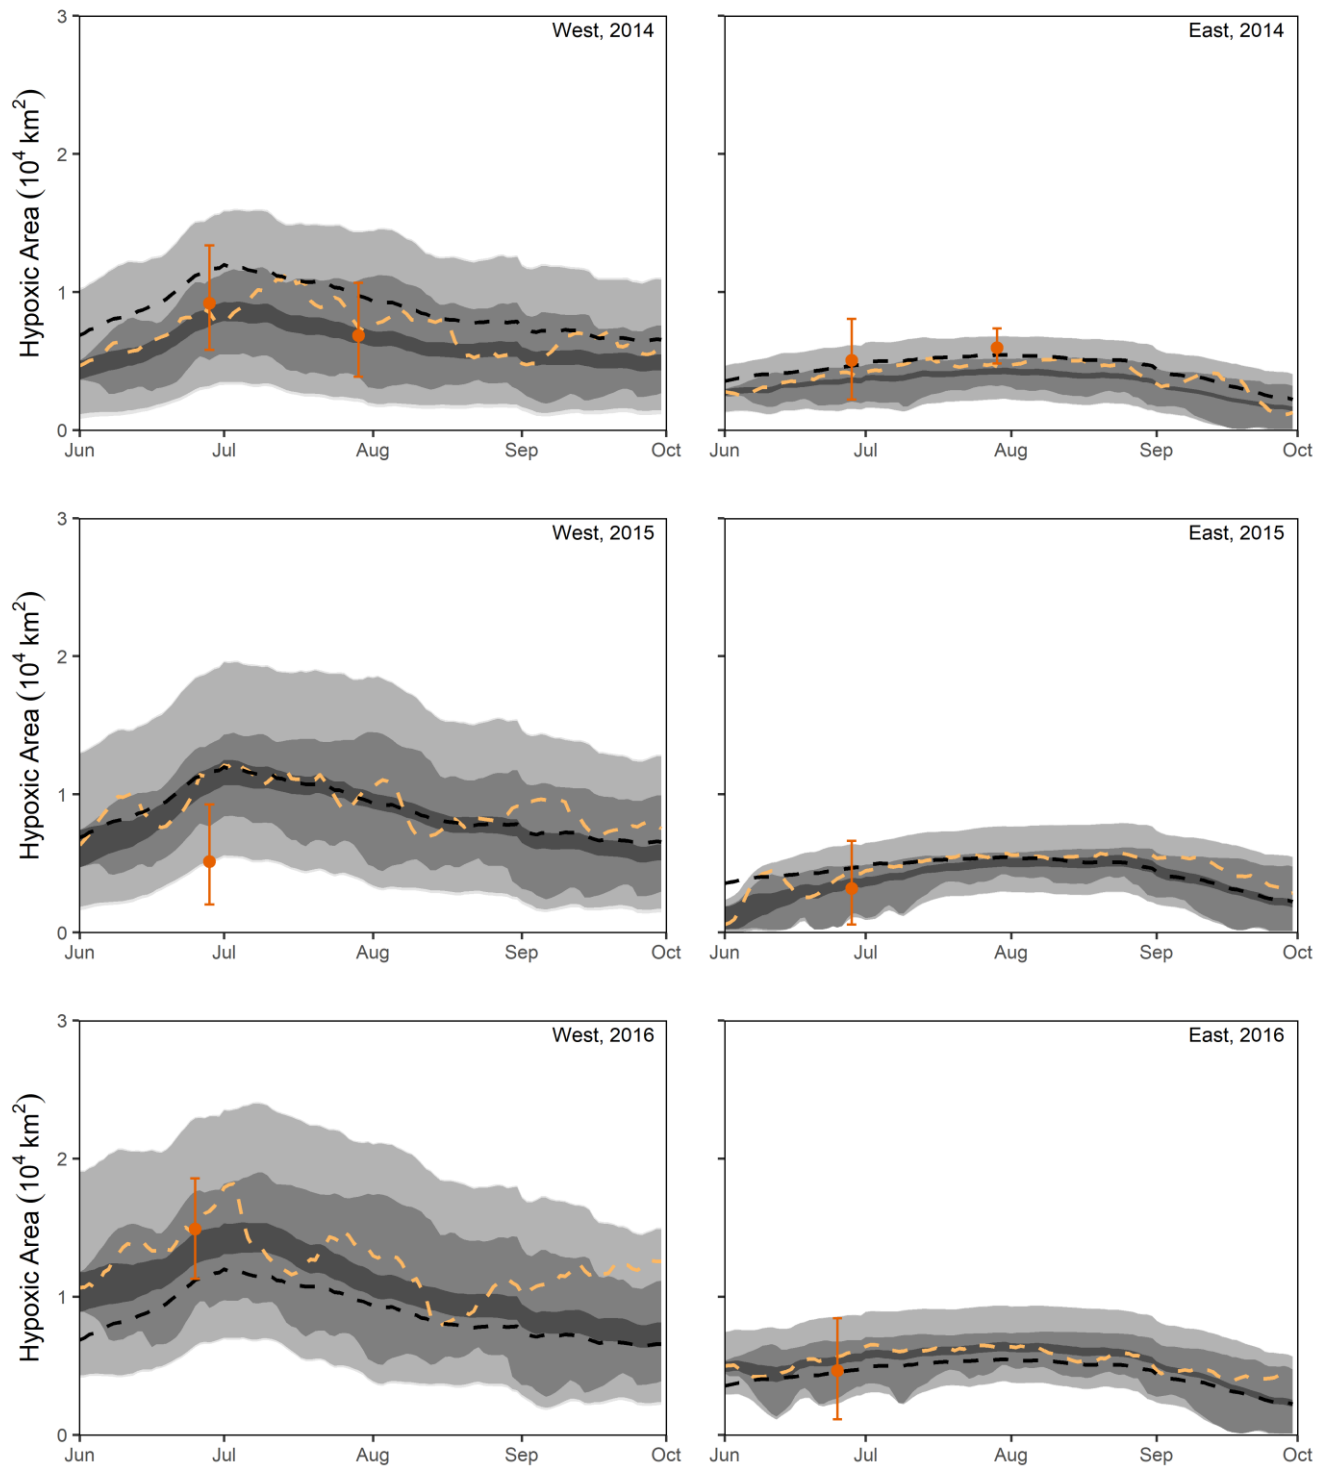

Figure S5.11: Pseudo-forecast as in Fig. S5.1 but for different years.

## S6 Total HA pseudo-forecast

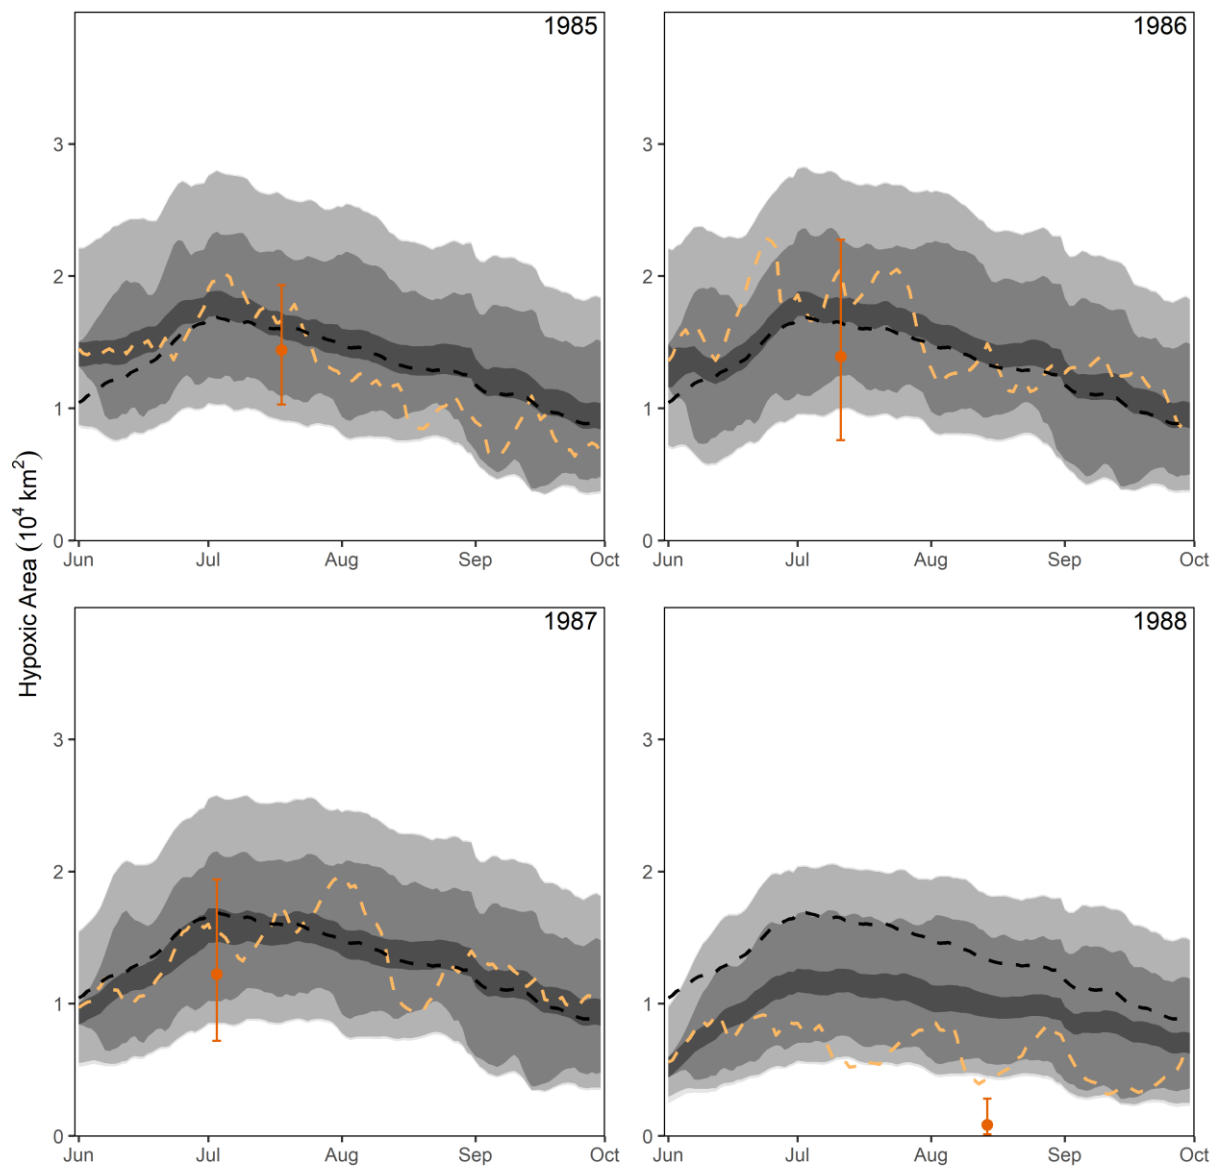

**Figure S6.1: Daily pseudo-forecasts of total HA, including 95% IQR of the predictive distribution, distinguishing between i) parameter, ii) hydrometeorological inputs, iii) mechanistic model error and iv) regression related to transformation (BWDO to HA) uncertainties (shades of gray from darkest to lightest). Yellow dashed line is hindcasted estimate, black dashed line is the 32 year average hindcast, orange points and error bars represent the mean and associated 95% confidence interval of the (geostatistically estimated) hypoxia observations.**



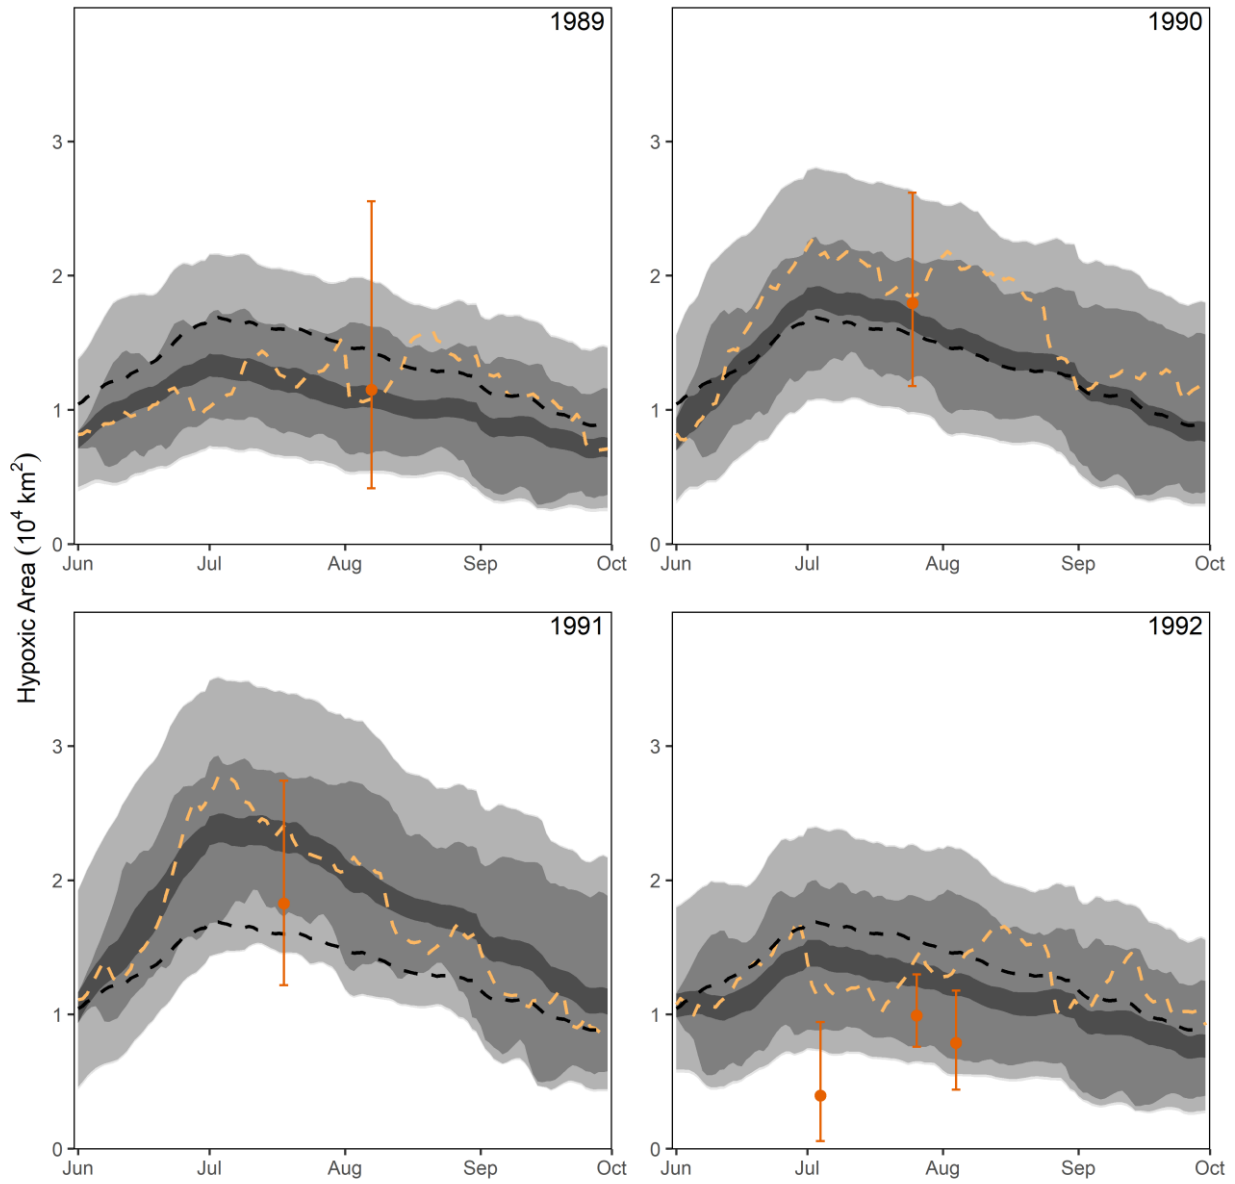

**Figure S6.2: Pseudo-forecast as in Fig. S6.1 but for different years.**

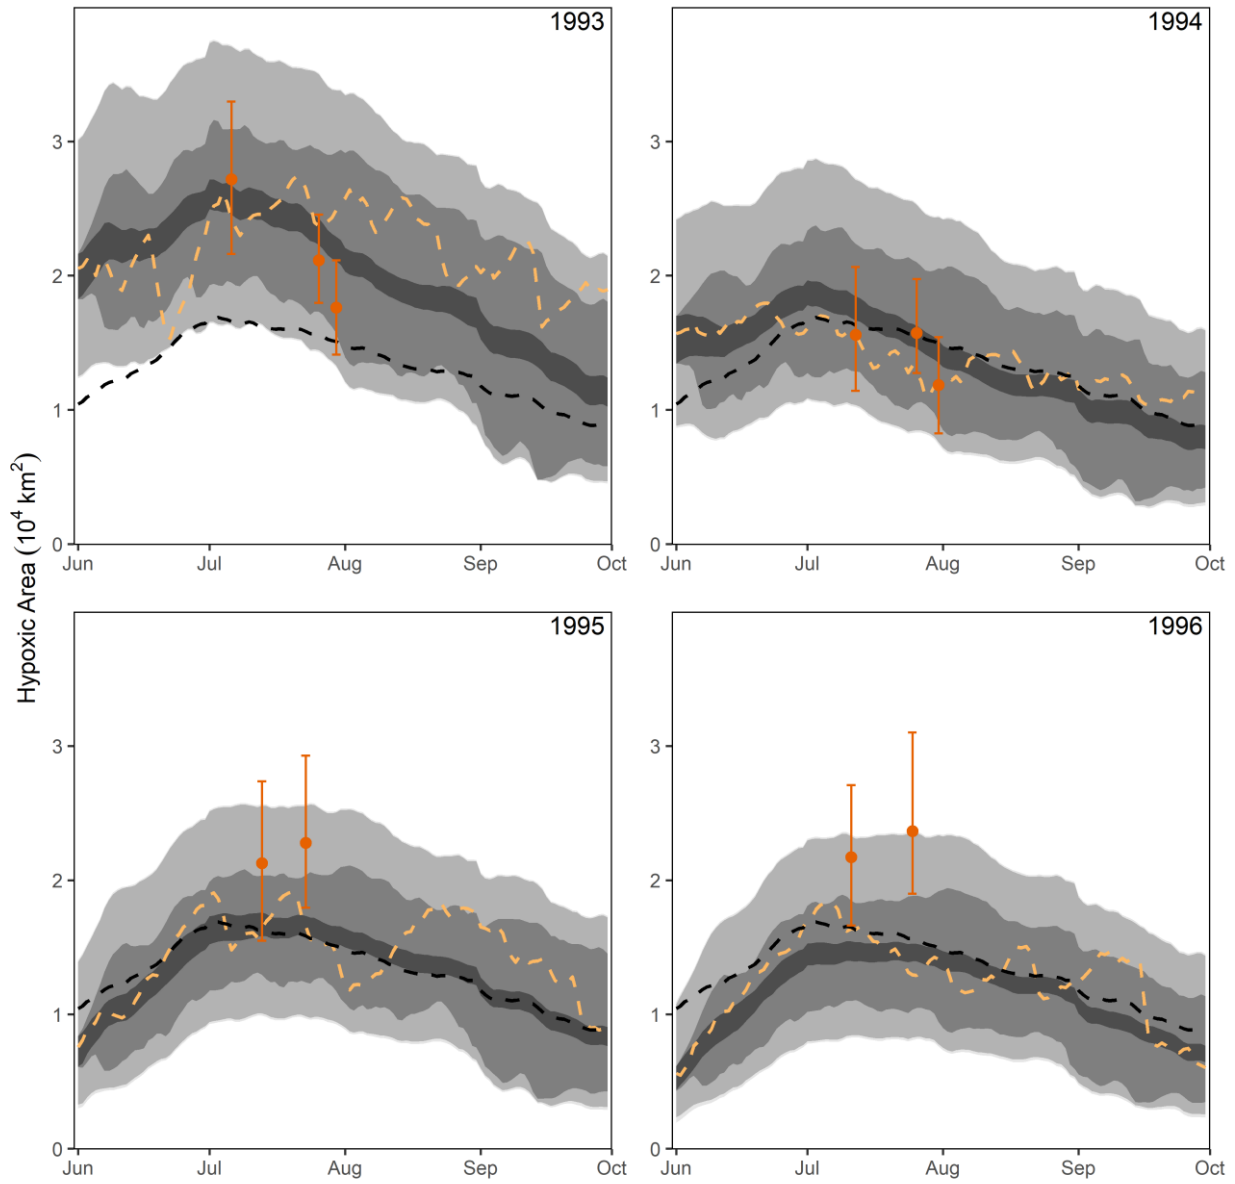

**Figure S6.3: Pseudo-forecast as in Fig. S6.1 but for different years.**

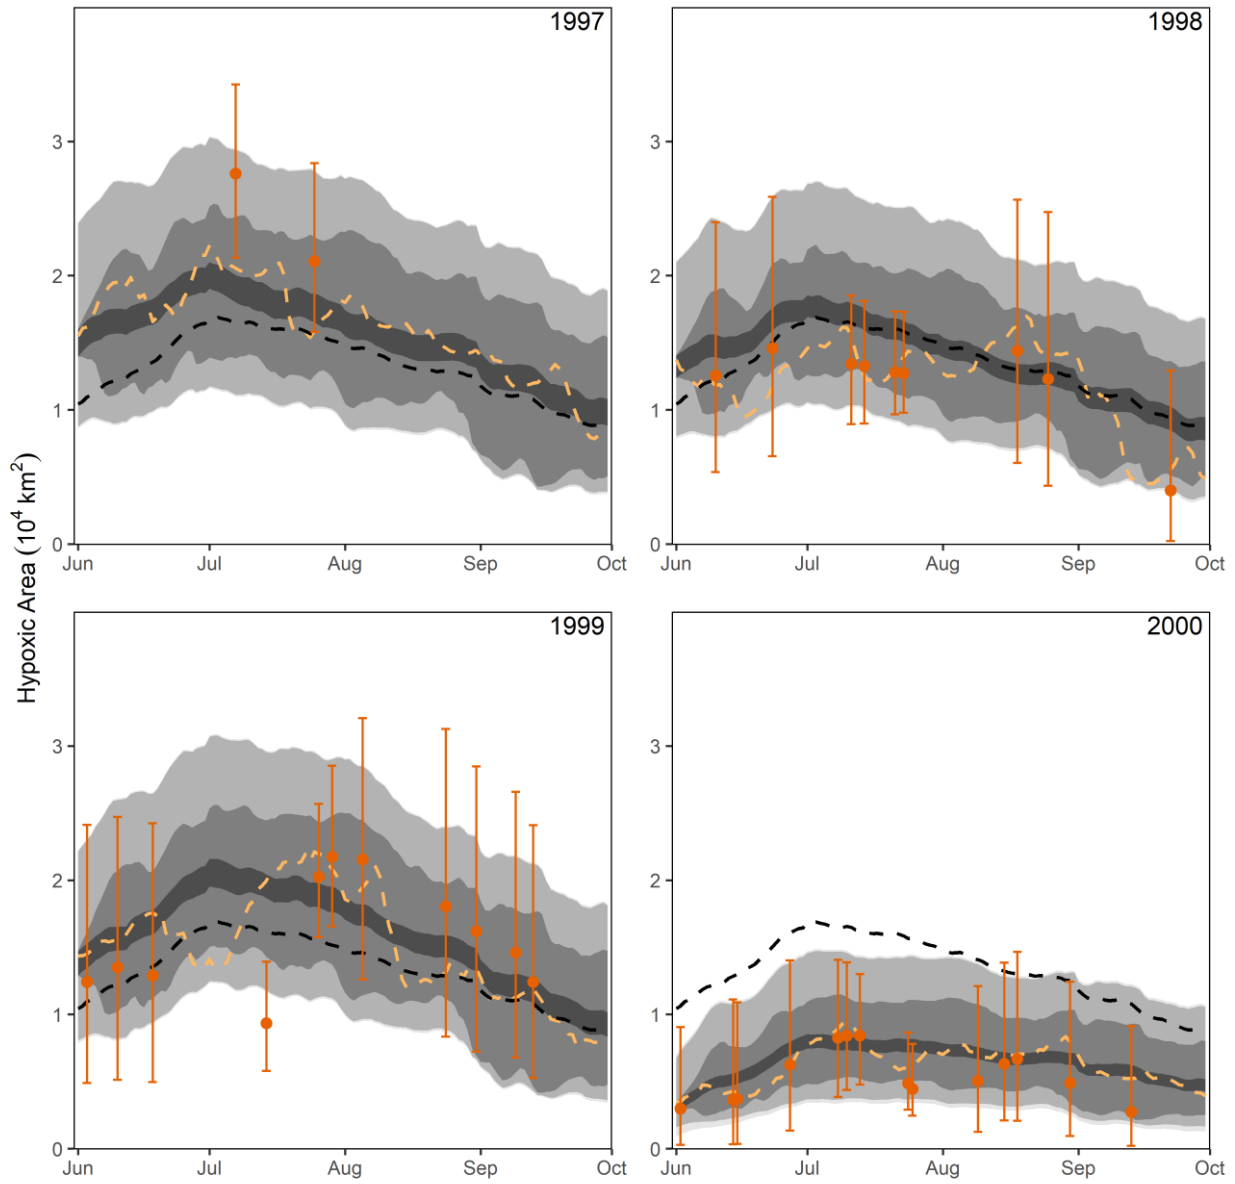

Figure S6.4: Pseudo-forecast as in Fig. S6.1 but for different years.

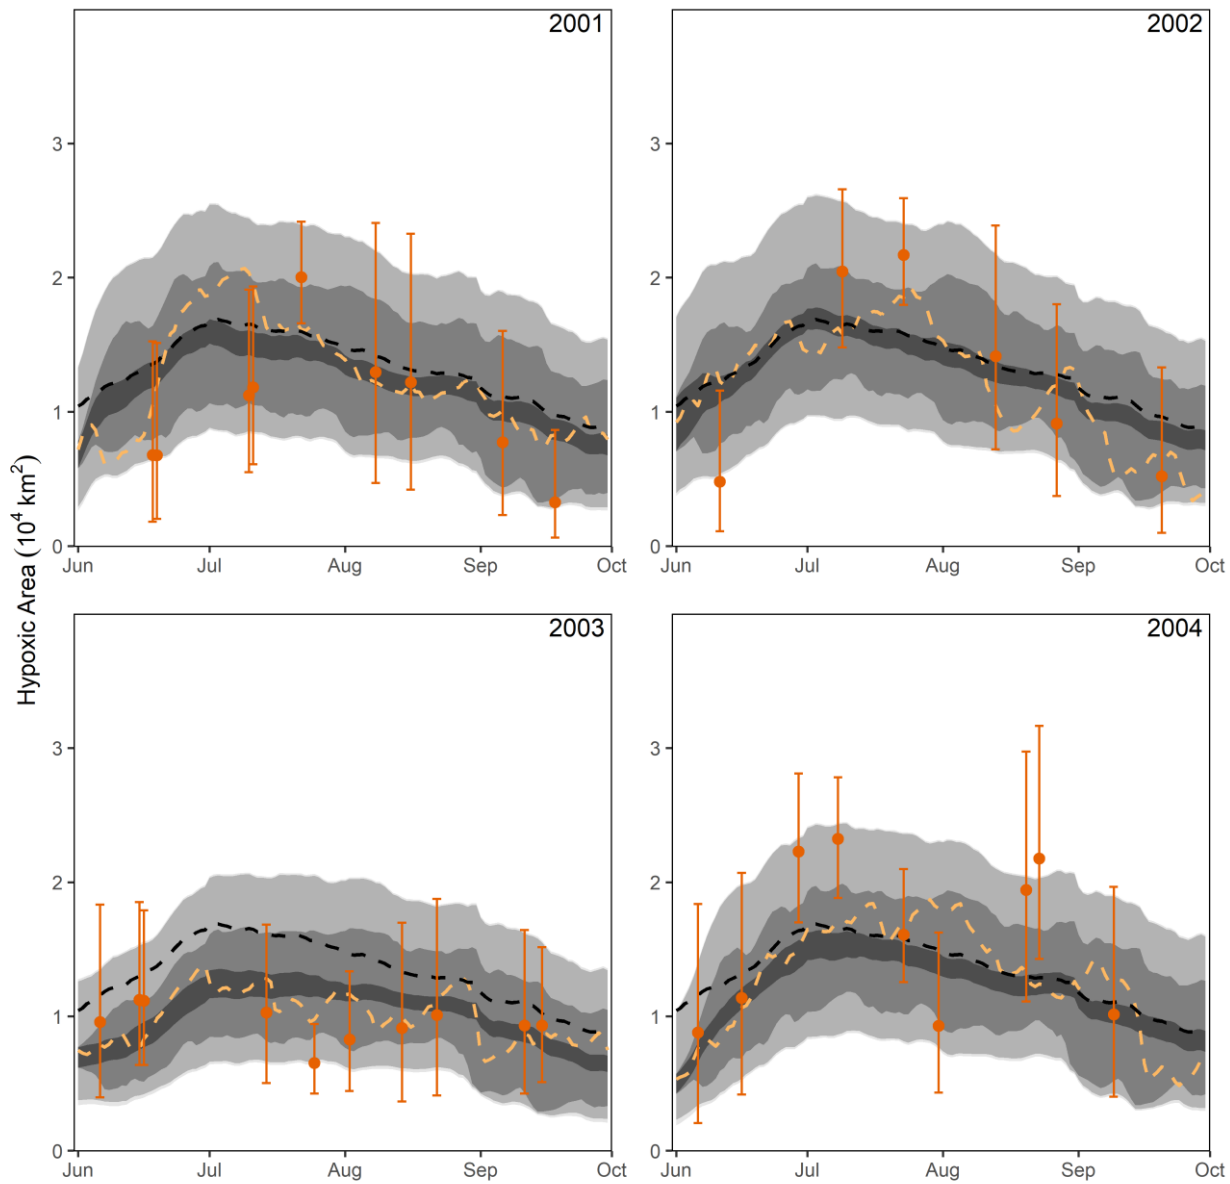

Figure S6.5: Pseudo-forecast as in Fig. S6.1 but for different years.

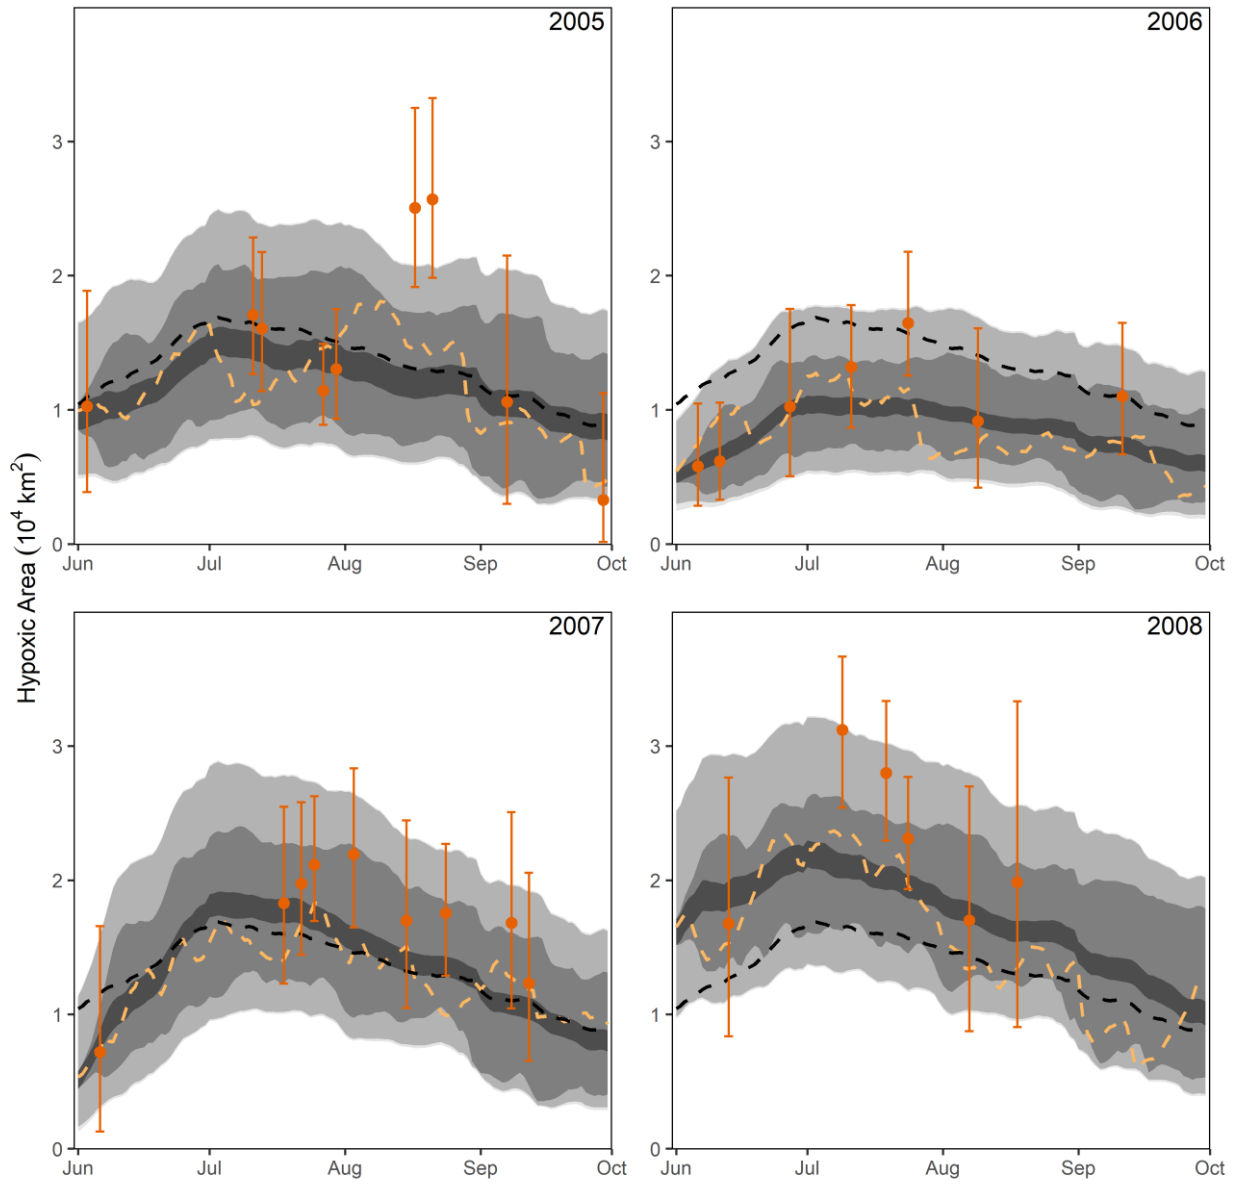

**Figure S6.6: Pseudo-forecast as in Fig. S6.1 but for different years.**

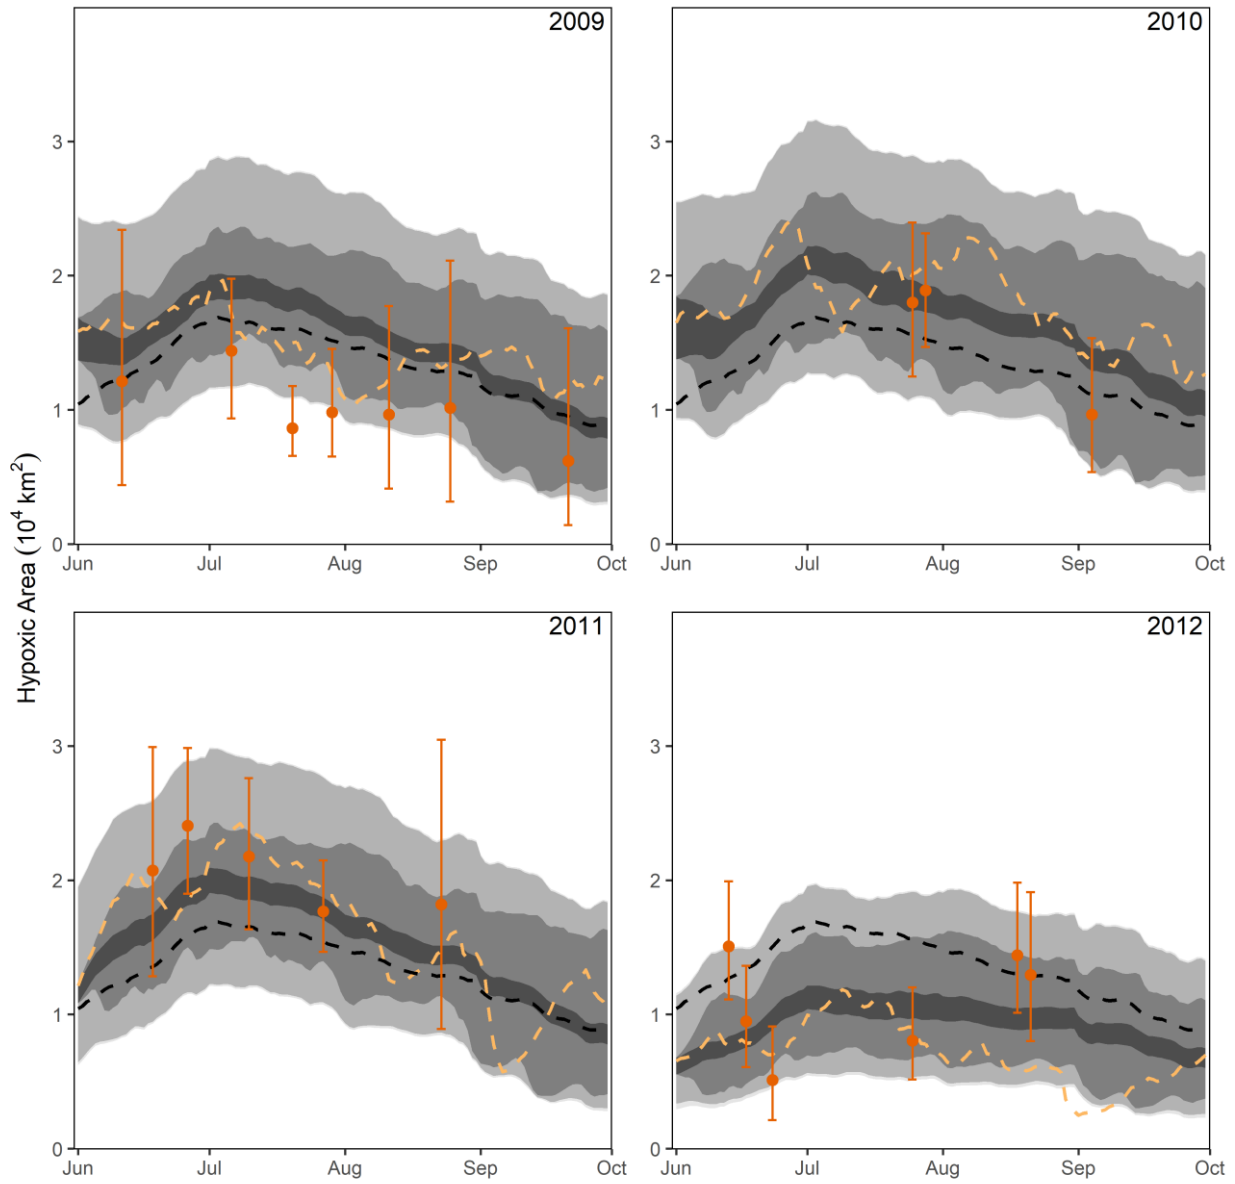

Figure S6.7: Pseudo-forecast as in Fig. S6.1 but for different years.

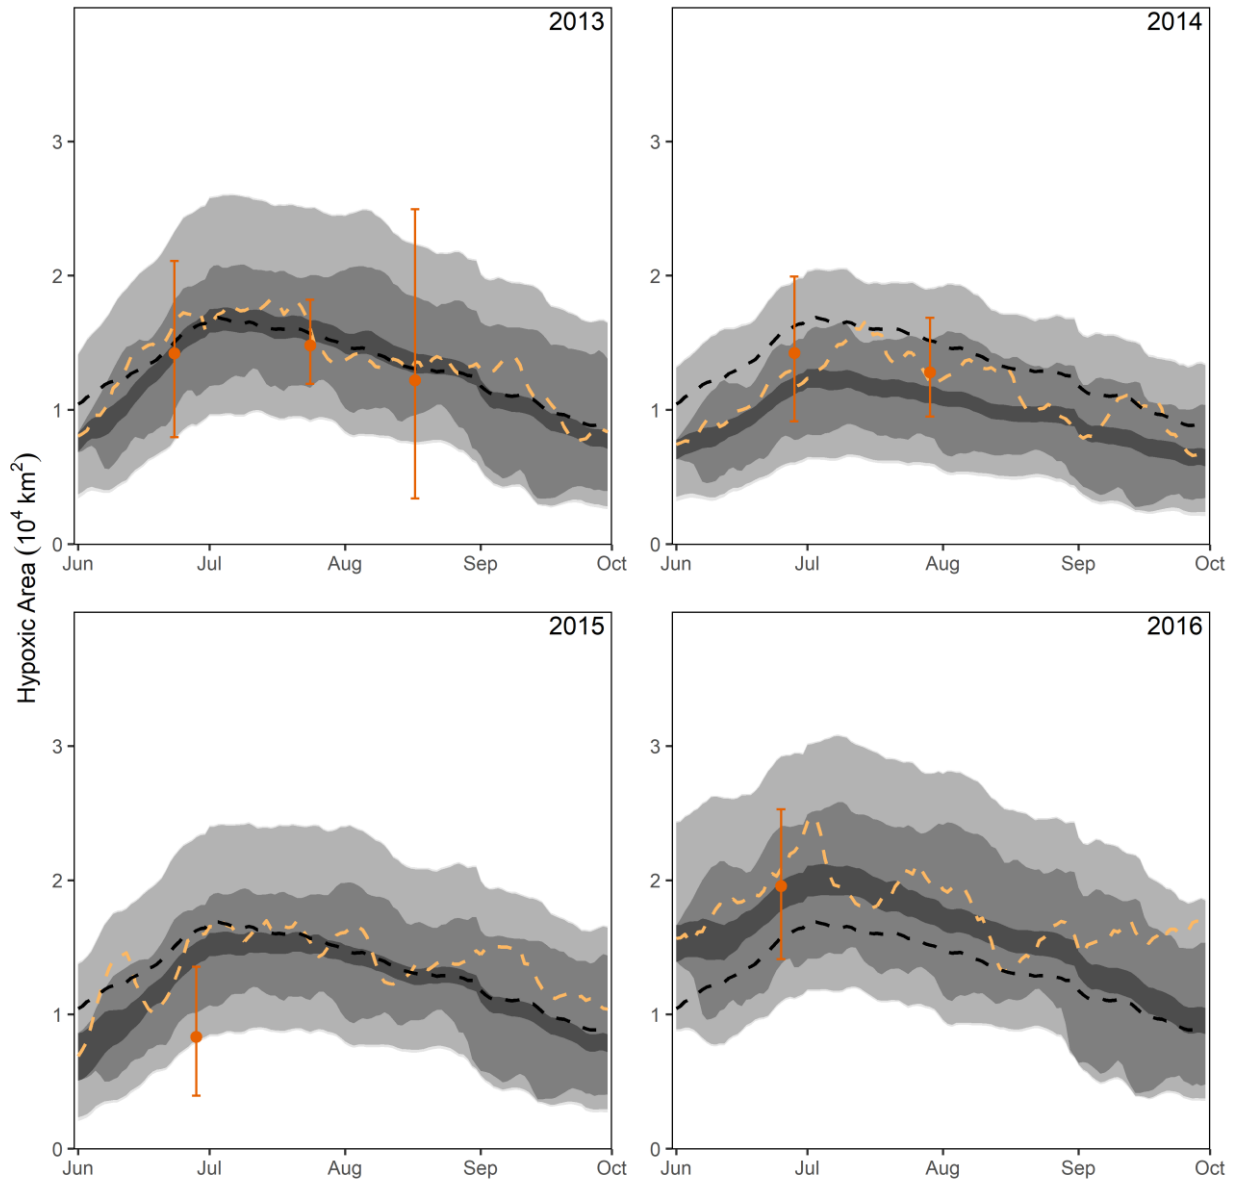

**Figure S6.8: Pseudo-forecast as in Fig. S6.1 but for different years.**
